# Supplementary material for: Comparison of olanexidine versus povidone-iodine for preventing surgical site infection in gastrointestinal surgery: study protocol for a multicentre, single-blind, randomised controlled clinical trial
Source: PubMed Central journal article supplement — BMJ Open. 2019 May 28;9(5):e028269. doi: 10.1136/bmjopen-2018-028269 (PMC6549615; doi:10.1136/bmjopen-2018-028269), 2019-05-28
Supplement: bmjopen-2018-028269.draft_revisions.pdf [file bmjopen-2018-028269.draft_revisions.pdf]

# BMJ Open

BMJ Open is committed to open peer review. As part of this commitment we make the peer review history of every article we publish publicly available.

When an article is published we post the peer reviewers' comments and the authors' responses online. We also post the versions of the paper that were used during peer review. These are the versions that the peer review comments apply to.

The versions of the paper that follow are the versions that were submitted during the peer review process. They are not the versions of record or the final published versions. They should not be cited or distributed as the published version of this manuscript.

BMJ Open is an open access journal and the full, final, typeset and author-corrected version of record of the manuscript is available on our site with no access controls, subscription charges or pay-per-view fees (<http://bmjopen.bmj.com>).

If you have any questions on BMJ Open's open peer review process please email [info.bmjopen@bmj.com](mailto:info.bmjopen@bmj.com)

# BMJ Open

## Comparison of olanexidine versus povidone-iodine for preventing surgical site infection in gastrointestinal surgery: study protocol for a multicenter, single-blind, randomized controlled clinical trial

|                               |                                                                                                                                                                                                                                                                                                                                                                                                                                                                                                                                                                                                                                                                                                                                                                                                                                                                                                                                                                                                                                                                                                                                                                                                                                                                                                                                                                                                                                                                                                                                                                                                                                                                                                                                                                                                                                                                                                                                                                                                                                                                                                                              |
|-------------------------------|------------------------------------------------------------------------------------------------------------------------------------------------------------------------------------------------------------------------------------------------------------------------------------------------------------------------------------------------------------------------------------------------------------------------------------------------------------------------------------------------------------------------------------------------------------------------------------------------------------------------------------------------------------------------------------------------------------------------------------------------------------------------------------------------------------------------------------------------------------------------------------------------------------------------------------------------------------------------------------------------------------------------------------------------------------------------------------------------------------------------------------------------------------------------------------------------------------------------------------------------------------------------------------------------------------------------------------------------------------------------------------------------------------------------------------------------------------------------------------------------------------------------------------------------------------------------------------------------------------------------------------------------------------------------------------------------------------------------------------------------------------------------------------------------------------------------------------------------------------------------------------------------------------------------------------------------------------------------------------------------------------------------------------------------------------------------------------------------------------------------------|
| Journal:                      | <i>BMJ Open</i>                                                                                                                                                                                                                                                                                                                                                                                                                                                                                                                                                                                                                                                                                                                                                                                                                                                                                                                                                                                                                                                                                                                                                                                                                                                                                                                                                                                                                                                                                                                                                                                                                                                                                                                                                                                                                                                                                                                                                                                                                                                                                                              |
| Manuscript ID                 | bmjopen-2018-028269                                                                                                                                                                                                                                                                                                                                                                                                                                                                                                                                                                                                                                                                                                                                                                                                                                                                                                                                                                                                                                                                                                                                                                                                                                                                                                                                                                                                                                                                                                                                                                                                                                                                                                                                                                                                                                                                                                                                                                                                                                                                                                          |
| Article Type:                 | Protocol                                                                                                                                                                                                                                                                                                                                                                                                                                                                                                                                                                                                                                                                                                                                                                                                                                                                                                                                                                                                                                                                                                                                                                                                                                                                                                                                                                                                                                                                                                                                                                                                                                                                                                                                                                                                                                                                                                                                                                                                                                                                                                                     |
| Date Submitted by the Author: | 29-Nov-2018                                                                                                                                                                                                                                                                                                                                                                                                                                                                                                                                                                                                                                                                                                                                                                                                                                                                                                                                                                                                                                                                                                                                                                                                                                                                                                                                                                                                                                                                                                                                                                                                                                                                                                                                                                                                                                                                                                                                                                                                                                                                                                                  |
| Complete List of Authors:     | <p>Takeuchi, Masashi; Keio University School of Medicine Graduate School of Medicine Department of Surgery<br/> Obara, Hideaki; Keio University School of Medicine Graduate School of Medicine Department of Surgery,<br/> Kawakubo, Hirofumi ; Keio University School of Medicine Graduate School of Medicine Department of Surgery<br/> Shinoda, Masahiro ; Keio University School of Medicine Graduate School of Medicine Department of Surgery<br/> Okabayashi, Koji ; Keio University School of Medicine Graduate School of Medicine Department of Surgery<br/> Mayanagi, Shuhei ; Keio University School of Medicine Graduate School of Medicine Department of Surgery<br/> Irinno, Tomoyuki; Keio University School of Medicine Graduate School of Medicine Department of Surgery<br/> Fukuda, Kazumasa; Keio University School of Medicine Graduate School of Medicine Department of Surgery<br/> Nakamura, Rieko; Keio University School of Medicine Graduate School of Medicine Department of Surgery<br/> Wada, Norihito ; Keio University School of Medicine Graduate School of Medicine Department of Surgery<br/> Kitago, Minoru ; Keio University School of Medicine Graduate School of Medicine Department of Surgery<br/> Yagi, Hiroshi ; Keio University School of Medicine Graduate School of Medicine Department of Surgery<br/> Abe, Yuta; Keio University School of Medicine Graduate School of Medicine Department of Surgery<br/> Oshima, Go ; Keio University School of Medicine Graduate School of Medicine Department of Surgery<br/> Hori, Shutaro ; Keio University School of Medicine Graduate School of Medicine Department of Surgery<br/> Tsuruta, Masashi ; Keio University School of Medicine Graduate School of Medicine Department of Surgery<br/> Ishida, Takashi ; Keio University School of Medicine Graduate School of Medicine Department of Surgery<br/> Yokose, Takahiro ; Keio University School of Medicine Graduate School of Medicine Department of Surgery<br/> Hirukawa, Kazuya ; Keio University School of Medicine Graduate School of Medicine Department of Surgery</p> |

1  
2  
3  
4  
5  
6  
7  
8  
9  
10  
11  
12  
13  
14  
15  
16  
17  
18  
19  
20  
21  
22  
23  
24  
25  
26  
27  
28  
29  
30  
31  
32  
33  
34  
35  
36  
37  
38  
39  
40  
41  
42  
43  
44  
45  
46  
47  
48  
49  
50  
51  
52  
53  
54  
55  
56  
57  
58  
59  
60

|                  |                                                                                                                                                                                                                                                                                                                                                                                                                                                                                                                                                                                                                                                                                                                                                        |
|------------------|--------------------------------------------------------------------------------------------------------------------------------------------------------------------------------------------------------------------------------------------------------------------------------------------------------------------------------------------------------------------------------------------------------------------------------------------------------------------------------------------------------------------------------------------------------------------------------------------------------------------------------------------------------------------------------------------------------------------------------------------------------|
|                  | <p>Isobe, Yoh; Department of Surgery, National Tokyo Medical Center<br/>         Sekimoto, Yasuhito ; Department of Surgery, National Tokyo Medical Center<br/>         Harada, Hirohisa ; Department of Surgery, Tokyo Saiseikai Central Hospital<br/>         Maeda, Yusuke ; Department of Surgery, Tokyo Saiseikai Central Hospital<br/>         Shito, Masaya ; Department of Surgery, Kawasaki Municipal Hospital<br/>         Kondo, Takayuki ; Department of Surgery, Kawasaki Municipal Hospital<br/>         Sato, Yasunori ; Department of Preventive Medicine and Public Health, Keio University School of Medicine<br/>         Kitagawa, Yuko ; Keio University School of Medicine Graduate School of Medicine Department of Surgery</p> |
| <p>Keywords:</p> | <p>WOUND MANAGEMENT, SURGERY, Gastrointestinal infections &lt; GASTROENTEROLOGY</p>                                                                                                                                                                                                                                                                                                                                                                                                                                                                                                                                                                                                                                                                    |
|                  |                                                                                                                                                                                                                                                                                                                                                                                                                                                                                                                                                                                                                                                                                                                                                        |

SCHOLARONE™  
Manuscripts

1  
2  
3  
4 **Comparison of olanexidine versus povidone-iodine for preventing surgical site infection**  
5  
6  
7 **in gastrointestinal surgery: study protocol for a multicenter, single-blind, randomized**  
8  
9 **controlled clinical trial**  
10  
11  
12

13  
14 Masashi Takeuchi, M.D.<sup>1</sup>; Hideaki Obara, M.D., Ph.D.<sup>1</sup>; Hirofumi Kawakubo, M.D., Ph.D.<sup>1</sup>;

15  
16  
17 Masahiro Shinoda, M.D., Ph.D.<sup>1</sup>; Koji Okabayashi, M.D., Ph.D.<sup>1</sup>; Shuhei Mayanagi, M.D.,

18  
19  
20 Ph.D.<sup>1</sup>; Tomoyuki Irino, M.D., Ph.D.<sup>1</sup>; Kazumasa Fukuda, Ph.D.<sup>1</sup>; Rieko Nakamura, M.D.,

21  
22  
23 Ph.D.<sup>1</sup>; Norihito Wada, M.D., Ph.D.<sup>1</sup>; Minoru Kitago, M.D., Ph.D.<sup>1</sup>; Hiroshi Yagi, M.D.,

24  
25  
26 Ph.D.<sup>1</sup>; Yuta Abe, M.D., Ph.D.<sup>1</sup>; Go Oshima, M.D., Ph.D.<sup>1</sup>; Shutaro Hori, M.D., Ph.D.<sup>1</sup>;

27  
28  
29 Masashi Tsuruta, M.D., Ph.D.<sup>1</sup>; Takashi Ishida, M.D., Ph.D.<sup>1</sup>; Takahiro Yokose, M.D.<sup>1</sup>;

30  
31  
32 Kazuya Hirukawa, M.D.<sup>1</sup>; Yoh Isobe, M.D., Ph.D.<sup>2</sup>; Yasuhito Sekimoto, M.D.<sup>2</sup>; Hirohisa

33  
34  
35 Harada, M.D., Ph.D.<sup>3</sup>; Yusuke Maeda, M.D.<sup>3</sup>; Masaya Shito, M.D., Ph.D.<sup>4</sup>; Takayuki Kondo,

36  
37  
38 M.D.<sup>4</sup>; Yasunori Sato, Ph.D.<sup>5</sup>; and Yuko Kitagawa, M.D., Ph.D.<sup>1</sup>

39  
40  
41 <sup>1</sup>Department of Surgery, Keio University School of Medicine, 35 Shinanomachi, Shinjuku-ku,

42  
43  
44  
45  
46  
47 Tokyo 160-8582, Japan

48  
49  
50 <sup>2</sup>Department of Surgery, National Tokyo Medical Center, 2-5-1 Higashigaoka, Meguro-ku,

51  
52  
53  
54  
55 Tokyo 152-8902, Japan

56  
57  
58 <sup>3</sup>Department of Surgery, Tokyo Saiseikai Central Hospital, 1-4-17 Mita, Minato-ku, Tokyo

1  
2  
3  
4 108-0073, Japan  
5  
6

7  
8 <sup>4</sup>Department of Surgery, Kawasaki Municipal Hospital, 12-1 Shinkawadori, Kawasaki-ku,  
9  
10  
11 Kawasaki-shi, Kanagawa 210-0013, Japan  
12  
13

14 <sup>5</sup>Department of Preventive Medicine and Public Health, Keio University School of Medicine,  
15  
16  
17 35 Shinanomachi, Shinjuku-ku, Tokyo 160-8582, Japan  
18  
19

20  
21 **Corresponding author:** Hideaki Obara, M.D., Ph.D.  
22

23  
24 Department of Surgery, Keio University School of Medicine, 35 Shinanomachi, Shinjuku-ku,  
25  
26  
27 Tokyo 160-8582, Japan  
28

29  
30  
31 E-mail: [obara.z3@keio.jp](mailto:obara.z3@keio.jp)  
32

33  
34 Tel: +81-3-3353-1211; Fax: +81-3-3755-4707  
35  
36

37  
38 **Word count:** 2536  
39  
40  
41  
42  
43  
44  
45  
46  
47  
48  
49  
50  
51  
52  
53  
54  
55  
56  
57  
58  
59  
60

## ABSTRACT

**Introduction:** Although several guidelines have indicated the efficacy of chlorhexidine and povidone-iodine for reducing the surgical site infection (SSI) rate, the optimal recommendation has still not been established, and the prevalence of SSI remains high in gastrointestinal surgery. Therefore, it is necessary to determine the more effective antiseptic for surgical site preparation. Olanexidine (1.5% Olanedine<sup>®</sup>, Otsuka Pharmaceutical Factory, Inc., Tokushima, Japan), which is a new antiseptic in Japan, has antimicrobial activity against a wide range of bacteria, including gram-positive bacteria and gram-negative bacteria.

**Methods and analysis:** We propose a multicenter, single-blind, randomized controlled clinical trial for comparing two treatments, that is, 1.5% olanexidine or 10% povidone-iodine, for surgical skin preparation to prevent SSI in gastrointestinal surgeries with class II surgical wounds. Patients aged  $\geq 20$  years at the time of consent will be included. The primary outcome measure is the 30-day postoperative SSI rate. Pearson's chi-square test or Fisher's exact test and Student's t-test will be used in the statistical analyses.

**Ethics and dissemination:** Participant recruitment began in June 2018. The final results will be published in international peer-reviewed medical journals.

**Trial registration number:** UMIN 000031560 (<https://upload.umin.ac.jp/cgi-open->

bin/ctr\_e/ctr\_view.cgi?recptno=R000036031)

For peer review only

1  
2  
3  
4  
5  
6  
7  
8  
9  
10  
11  
12  
13  
14  
15  
16  
17  
18  
19  
20  
21  
22  
23  
24  
25  
26  
27  
28  
29  
30  
31  
32  
33  
34  
35  
36  
37  
38  
39  
40  
41  
42  
43  
44  
45  
46  
47  
48  
49  
50  
51  
52  
53  
54  
55  
56  
57  
58  
59  
60

## Article Summary

### Strengths and limitations of this study

- This is the first study to evaluate the effect of olanexidine, which has been commercially available since 2015 in Japan.
- To evaluate whether olanexidine or povidone-iodine, the conventional skin antiseptic used in Japan, is useful for preventing surgical site infection (SSI) in gastrointestinal surgery.
- The study design is a multicenter, single-blind, randomized controlled clinical trial.
- The primary outcome measure is the 30-day postoperative SSI rate.



## INTRODUCTION

Surgical site infection (SSI) is one of the most common nosocomial infections in surgical patients.<sup>1</sup> Especially, the rate of SSI is higher in gastrointestinal surgery than in other surgeries, such as cardiothoracic surgery, gynecologic surgery, and neurosurgery,<sup>2-4</sup> and it has been reported that 10% to 30% of patients suffer from SSI after gastrointestinal surgery.<sup>5</sup> SSI not only causes prolonged hospitalization and delay of postoperative therapy, but it also causes increased medical costs—\$1300-5000 per person for inpatient treatment including antibiotic therapy.<sup>6,7</sup> Therefore, prevention of SSI is extremely important to both the patient and all medical practitioners involved in the surgery.

Many perioperative measures for decreasing SSI have been reported, including enhanced nutritional support, perioperative oxygenation, surgical technique, wound dressing, and use of an antimicrobial agent.<sup>1,8</sup> Surgical site preparation is one of the useful procedures for preventing SSI because microorganisms are removed from the skin. Thus far, two types of preparations, povidone-iodine and chlorhexidine,<sup>9-12</sup> have been commonly used as preoperative antiseptic procedures worldwide. The Centers for Disease Control and Prevention (CDC) guideline just recommends skin preparation with an alcohol-containing agent if there are no contraindications to its use, and other guidelines do not favor one antiseptic agent over another

1  
2  
3  
4 for skin preparation.<sup>1,13,14</sup> Both preparations have broad-spectrum antibacterial effectiveness;  
5  
6  
7 however, chlorhexidine is not effective against some pathogens, such as methicillin-resistant  
8  
9  
10 *Staphylococcus aureus* (MRSA)<sup>15</sup> and vancomycin-resistant enterococci (VRE),<sup>16</sup> of which  
11  
12  
13 infection should be avoided. On the other hand, povidone-iodine is known to decrease its  
14  
15  
16 activity under the presence of organic materials included blood or pus.<sup>17</sup> Therefore, it is  
17  
18  
19 necessary to determine the more effective antiseptic for surgical site preparation.  
20  
21  
22

23  
24 Olanexidine (1.5% Olanedine®; Otsuka Pharmaceutical Factory, Inc., Tokushima, Japan),  
25  
26  
27 which is a new antiseptic, is one of the biguanide bactericidal disinfectants that contains  
28  
29  
30 olanexidine gluconate as its active ingredient.<sup>18,19</sup> It has been commercially available since  
31  
32  
33 2015 in Japan. It can disrupt membrane integrity by binding to the cell membrane; this results  
34  
35  
36 in irreversible leakage of intracellular components, and its bacteriostatic and fungicidal  
37  
38  
39 activities are exerted.<sup>18</sup> Olanexidine has antimicrobial activity against a wide range of bacteria,  
40  
41  
42 including gram-positive bacteria and gram-negative bacteria. Moreover, Inoue et al. reported  
43  
44  
45 that compared to chlorhexidine and povidone-iodine, olanexidine showed more potent  
46  
47  
48 bactericidal activity against MRSA and VRE both in vitro and in vivo.<sup>18</sup> Therefore, the use of  
49  
50  
51 olanexidine is highly expected to lead to decreases in the SSI rate. However, to date, no study  
52  
53  
54  
55  
56  
57  
58  
59  
60

1  
2  
3  
4 has evaluated the effectiveness and safety of olanexidine compared to conventional antiseptics  
5  
6  
7  
8 in large-scale clinical trials.  
9

10  
11 In this multicenter, single-blinded, randomized controlled clinical trial, we aim to evaluate  
12  
13  
14 whether olanexidine or povidone-iodine, which is the conventional skin antiseptic used in  
15  
16  
17 Japan, is useful for preventing SSI in gastrointestinal surgery. We hypothesize that olanexidine  
18  
19  
20 will be more useful for preventing SSI than povidone-iodine without increasing toxicity.  
21  
22  
23  
24  
25  
26  
27  
28  
29  
30  
31  
32  
33  
34  
35  
36  
37  
38  
39  
40  
41  
42  
43  
44  
45  
46  
47  
48  
49  
50  
51  
52  
53  
54  
55  
56  
57  
58  
59  
60

## METHODS

### Trial design

This trial is a multi-center, prospective, randomized, open-label, blinded-endpoint trial (PROBE) designed to assess the efficacy of 1.5% olanexidine for surgical skin preparation for preventing SSIs in gastrointestinal surgery. The trial was designed and will independently be conducted by Keio University with approval from the ethics committee of Keio University School of Medicine in accordance with the principals of the Declaration of Helsinki. All analyses will be conducted by Keio University, independent of the sponsor, according to the prespecified statistical analysis plan (SAP). As a prospective randomized controlled trial, the study strategy will be constructed and presented in accordance with the recommendations of the CONSORT statement.

### Eligibility criteria

Eligible patients are those who meet all of the following inclusion criteria and who do not have any listed exclusion criteria.

- Inclusion criteria
  - 1) Scheduled to undergo elective gastrointestinal surgery involving the esophagus, stomach,

1  
2  
3  
4 duodenum, small intestine, colorectal, liver, biliary tract, and pancreas that has a class II  
5  
6  
7 surgical wound (Figure 1).  
8

9  
10 2) Age  $\geq 20$  years at the time of consent by nonblinded investigators  
11  
12

13  
14 3) Provision of written informed consent by the patient.  
15  
16

17 • Exclusion criteria  
18

19  
20  
21 1) Allergy to olanexidine gluconate or povidone-iodine.  
22  
23

24 2) Unable to undergo follow-up 30 days postoperatively.  
25  
26

27 3) Active bacterial infection at the time of informed consent (except for viral hepatitis).  
28  
29

30 4) Receipt of antimicrobial therapy on the day before surgery.  
31  
32

33 5) Undergoing non-elective surgery or surgery requiring antisepsis of the mucosal surfaces or  
34  
35 surgical wound sites.  
36  
37

38 6) Unsuitable conditions for safe conduct of this trial according to the nonblinded investigators.  
39  
40  
41  
42  
43  
44  
45  
46  
47

## 48 **Intervention**

49  
50  
51 Study arm A (experimental group): Surgical skin antisepsis with 1.5% olanexidine is  
52  
53 administered just before gastrointestinal surgery.  
54  
55

56  
57 Study arm B (control group): Surgical skin antisepsis with 10% povidone-iodine is  
58  
59  
60

1  
2  
3  
4 administered just before gastrointestinal surgery.  
5  
6  
7  
8  
9

## 10 **Recruitment of study participants**

11  
12  
13  
14 The trial protocol (October/ 24/2018, ver1.3) was approved by each participating  
15  
16  
17 institution's institutional review board and registered in the University Hospital Medical  
18  
19  
20 Information Network Clinical Trials Registry (number UMIN 000031560). Recruitment into  
21  
22  
23 the trial started in May 2018 and will continue until 600 participants are registered. All  
24  
25  
26 participants who meet inclusion criteria will be provided with a participant information sheet  
27  
28  
29 by investigators before giving written informed consent. This study is being conducted in 4  
30  
31  
32 general centers: Keio University Hospital (Tokyo, Japan), National Tokyo Medical Center  
33  
34  
35 (Tokyo, Japan), Tokyo Saiseikai Central Hospital (Tokyo, Japan), and Kawasaki Municipal  
36  
37  
38 Hospital (Kanagawa, Japan).  
39  
40  
41  
42  
43  
44  
45  
46  
47  
48

## 49 **Randomization**

50  
51 Registration and allocation of participants is generated by nonblinded investigators using the  
52  
53  
54 CapTool® Lite (Mebix, Inc., Tokyo, Japan). Eligible patients will be randomized to either  
55  
56  
57 surgical skin antisepsis with olanexidine (study arm A) or surgical skin antisepsis with  
58  
59  
60

1  
2  
3  
4 povidone-iodine (study arm B) in a 1:1 replacement ratio. The random sequence will be  
5  
6  
7 generated from computer-generated block randomization. We designated the factor of surgical  
8  
9 approach (laparoscopy versus laparotomy) as the allocation adjustment factor because of  
10  
11 evidence that there is a significantly higher SSI rate in laparotomy than in laparoscopy.<sup>20</sup>  
12  
13  
14  
15  
16  
17  
18  
19  
20

### 21 **Blinding**

22  
23  
24 Both patients and blinded investigators will be masked to the assigned group. Although there  
25  
26 is a difference in color between povidone-iodine and olanexidine, it is feasible for patients to  
27  
28 be masked because we wipe the stain of the antiseptic off their skin postoperatively.  
29  
30  
31 Nonblinded investigators cannot be masked because he/she will be in the operating room when  
32  
33 the antiseptic is used.  
34  
35  
36  
37  
38  
39

40  
41 A diagnosis of SSI, which is reported by nonblinded investigators, will be verified by chart  
42  
43 review, and blinded investigators will verify the diagnosis without knowledge of the group to  
44  
45 which the patients were assigned.  
46  
47  
48  
49  
50

### 51 **Outcome measures**

52  
53  
54 The duration of observation will be 30 days postoperatively. The nonblinded investigators  
55  
56  
57  
58  
59  
60

1  
2  
3  
4 will observe the surgical wound site daily during admission. After discharge, participants will  
5  
6  
7  
8 undergo outpatient observation at least once if it is within 30 days postoperatively. Nonblinded  
9  
10  
11 investigators will observe the surgical wound in the same manner as during the hospital stay.

12  
13  
14 We also recommend that patients visit outpatient clinic or an emergency department if there  
15  
16  
17 are any symptoms suggestive of SSI such as pain or redness. If SSI is suspected based on the  
18  
19  
20 clinical findings, a microbiological culture would be collected using a cotton swab. The  
21  
22  
23 diagnosis of SSI will be determined by blinded investigators who will be unaware of the  
24  
25  
26 patients' group assignment. The investigator will verify the SSI via chart review by using the  
27  
28  
29 questionnaire for SSI provided by the nonblinded investigators in accordance with the CDC  
30  
31  
32 guideline. Moreover, blinded investigators will assess the seriousness of all adverse events and  
33  
34  
35 determine whether they are related to the study.  
36  
37  
38  
39  
40

#### 41 (1) Primary outcome measure

42  
43  
44 Postoperative 30-day SSI rate.  
45  
46

#### 47 (2) Secondary outcome measures

48  
49  
50 Postoperative 30-day superficial incisional SSI rate, deep incisional SSI rate, organ/space SSI  
51  
52  
53 rate, rate of positive bacterial wound culture, bacterial strains, and rates of toxicity and allergy  
54  
55  
56 events (e.g., erythema and symptoms of allergy).  
57  
58  
59  
60



## Definitions

SSIs are classified as superficial incisional SSIs, deep incisional SSIs, and organ/space SSIs based on criteria in the CDC guidelines.<sup>1</sup>

### (i) Superficial incisional SSI

Superficial incisional SSI must meet the following three criteria (A, B, and C).

A) Infection occurred within 30 days postoperatively.

B) The infection affects only the incision in the skin and the subcutaneous tissue.

C) At least one of the following is applicable:

a. purulent drainage is observed from the superficial incision,

b. organisms are identified from the superficial incision or subcutaneous tissue by a culture or non-culture based microbiologic testing method, and/or

c. the superficial incision is deliberately opened by a nonblinded investigator, and culture or non-culture based testing is not performed.

In addition, at least one of the following symptoms for infection must be applicable: pain, pressure pain, localized swelling, erythema, or fever.

### (ii) Deep incisional SSI

1  
2  
3  
4 Deep incisional SSI must meet the following three criteria (A, B, and C).  
5  
6

7 A) Infection occurred within 30 days postoperatively.  
8  
9

10 B) The infection reaches the deep soft tissues of the incision (fascia or muscle layer).  
11  
12

13 C) At least one of the following is applicable:  
14  
15

16 a. purulent drainage is observed from the deep incision,  
17  
18

19 b. the deep incision spontaneously dehisces, or is deliberately opened or aspirated by a  
20  
21 nonblinded investigators, and/or  
22  
23

24 c. an abscess or other evidence of infection is present and involves the deep incision.  
25  
26  
27

28  
29  
30 In addition, the organism is identified by a culture or non-culture based microbiologic testing  
31  
32 method that is performed for purposes of clinical diagnosis or treatment, and symptoms for  
33  
34 infection must be applicable: fever, localized pain, or tenderness. Negative finding of a culture  
35  
36 does not meet this criterion.  
37  
38  
39  
40  
41  
42  
43

44 (iii) Organ/space SSI  
45  
46

47 Organ/space SSI involves any part of the body other than the skin incision, fascia, or muscle  
48  
49 layer that has been opened or manipulated during surgery. The specific site is classified as  
50  
51 organ/space for the purpose of further identification of the infection site. Organ/space SSI must  
52  
53  
54 meet the following three criteria (A, B, and C).  
55  
56  
57  
58  
59  
60

1  
2  
3  
4 A) Infection occurred within 30 days postoperatively.  
5  
6

7  
8 B) The infection involves any part of the body that is opened or manipulated during the  
9  
10  
11 operative procedure (except for the facial/muscle layers).  
12  
13

14 C) At least one of the following is applicable:  
15

16  
17 a. purulent drainage is observed from a drain that is placed into the organ/space,  
18

19  
20  
21 b. organisms are identified from fluid or tissue in the organ/space by a culture or non-culture  
22  
23  
24 based microbiologic testing method, and/or  
25

26  
27  
28 c. an abscess or other evidence of infection is present and involves the organ/space.  
29  
30  
31  
32  
33

### 34 **Data collection**

35  
36  
37 All data will be collected and recorded into the web-based electronic CRF (CapTool® Lite) by  
38  
39  
40 the trial or nonblinded investigators. From the electronic CRF, the trial database will be  
41  
42  
43 established. Patients' characteristics, such as sex, age, smoking status, comorbidities, such as  
44  
45  
46 diabetes mellitus, and steroid use, will be collected.  
47  
48

49  
50  
51 Data will also be collected regarding the surgical procedures such as the type of surgery, use  
52  
53  
54 of laparoscopy, method of wound closure, type of prophylactic antiseptic agent, repeat  
55  
56  
57 application of an antiseptic agent, use of sterilized sutures for wound closure, amount of  
58  
59  
60

1  
2  
3  
4 intraperitoneal irrigation, amounts of wound irrigation and blood loss, and status of excision  
5  
6  
7 site into the electric CRF. We will confirm that personal identifying information such as name,  
8  
9  
10 medical record ID are deleted from data. Thereafter, a linkable anonymization number is set  
11  
12  
13  
14 and stored by a personal information manager for at least 5 years after study completion.  
15  
16  
17  
18  
19  
20

### 21 **Sample size calculation**

22  
23  
24 In our institution, the estimated proportions of SSI in gastrointestinal surgery with wound  
25  
26  
27 class II are 12% after povidone-iodine use and 6% after olanexidine use. Assuming a group  
28  
29  
30 difference of 6% during the study period, 281 patients per group would provide a power over  
31  
32  
33  
34 80%, which is sufficient for detecting a difference in the proportion of SSI between olanexidine  
35  
36  
37 and povidone-iodine using a one-sided, chi-square test at a 5% level of significance. A dropout  
38  
39  
40 rate of about 5% is allowed; thus, with 300 patients required per group, a total sample size of  
41  
42  
43  
44 600 patients is required for the trial.  
45  
46  
47  
48  
49  
50

### 51 **Statistical analysis**

52  
53 Analyses of the primary and secondary efficacy outcomes will be performed using the full  
54  
55 analysis set, which includes all patients who took at least one dose of treatment during the study,  
56  
57 did not have any serious violation of the study protocol, and had data collected after treatment  
58  
59 commencement. Safety analysis will be conducted in the safety analysis population. For the  
60

1  
2  
3 baseline variables, summary statistics will be performed using frequencies and proportions for  
4  
5 categorical data, and means and standard deviations for continuous variables. Patient  
6  
7 characteristics will be compared using Pearson's chi-square test or Fisher's exact test for  
8  
9 categorical outcomes and Student's t-test for continuous variables, as appropriate. For the  
10  
11 primary analysis, which is aimed at comparing the treatment effects, the adjusted risk ratio and  
12  
13 its 95% confidence interval will be estimated using the Mantel-Haenszel method. To test for a  
14  
15 significant association of the primary outcome, the Mantel-Haenszel test will be applied after  
16  
17 adjusting for allocation factors. All comparisons are planned, and all *p*-values will be two sided.  
18  
19 *P*-values <0.05 will be considered statistically significant. All statistical analyses will be  
20  
21 performed using SAS software version 9.4 (SAS Institute, Cary, NC, USA). The SAP will be  
22  
23 developed by the principal investigator and the biostatistician before completion of patient  
24  
25 recruitment and data fixation.  
26  
27  
28  
29  
30  
31  
32  
33  
34  
35  
36  
37  
38  
39  
40  
41  
42  
43  
44  
45  
46  
47  
48  
49  
50  
51  
52  
53  
54  
55  
56  
57  
58  
59  
60

## ETHICS AND DISSEMINATION

Participant recruitment began in June 2018. The final results will be published in international peer-reviewed medical journals.

For peer review only

## DISCUSSION

Although some guidelines have indicated the efficacy of chlorhexidine and povidone-iodine for reducing the SSI rate, the optimal recommendation has still not been established, and the prevalence of SSI remains high in gastrointestinal surgery. Therefore, a comparative trial between conventional antiseptics including chlorhexidine and povidone-iodine, and newly antiseptics that considers their effectiveness, toxicity, and costs is needed.<sup>8</sup>

We have been conducting a randomized controlled clinical trial to compare olanexidine and povidone-iodine, which is the most popular antiseptic in Japan in terms of prevalence of SSI and toxicity. The strength in this trial is that we adopted a single-blind system for diagnosing SSI in multiple centers. To maintain the quality of practices, only 4 centers, all of which are high-volume centers performing greater than 500 gastrointestinal surgeries per year, are participating in this trial. Furthermore, since the staff in each center belongs to the SSI control committee for providing unified and evidence-based counter measures against SSI in Keio University Hospital, the management of SSI in each center can be performed in almost the same manner.

This study has several limitations. First, this trial is recruiting patients with various types of gastrointestinal surgery, such as esophagectomy, gastrectomy, and cholecystectomy, and there

1  
2  
3  
4 are differences in the prevalence of SSI according to the type of surgery. However, there is no  
5  
6  
7  
8 major bias in allocation because it is randomized. Furthermore, since this is the first report  
9  
10  
11 using olanexidine, it is more important to include various types of surgery than limiting the  
12  
13  
14 study to a particular type of surgery. Second, this study is limited to a Japanese population,  
15  
16  
17 which could introduce an element of selection bias, because olanexidine is only commercially  
18  
19  
20 available in Japan.  
21  
22

23  
24 In conclusion, the present study is assessing the efficacy of olanexidine compared to  
25  
26  
27 povidone-iodine for preventing SSI in gastrointestinal surgery. We expect olanexidine to be  
28  
29  
30 more useful for preventing SSI than povidone-iodine without increasing toxicity. Even if this  
31  
32  
33 expectation is not the predicted result, this trial can provide new knowledge in the aspect of  
34  
35  
36  
37  
38  
39  
40  
41  
42  
43  
44  
45  
46  
47  
48  
49  
50  
51  
52  
53  
54  
55  
56  
57  
58  
59  
60  
61  
62  
63  
64  
65  
66  
67  
68  
69  
70  
71  
72  
73  
74  
75  
76  
77  
78  
79  
80  
81  
82  
83  
84  
85  
86  
87  
88  
89  
90  
91  
92  
93  
94  
95  
96  
97  
98  
99  
100  
101  
102  
103  
104  
105  
106  
107  
108  
109  
110  
111  
112  
113  
114  
115  
116  
117  
118  
119  
120  
121  
122  
123  
124  
125  
126  
127  
128  
129  
130  
131  
132  
133  
134  
135  
136  
137  
138  
139  
140  
141  
142  
143  
144  
145  
146  
147  
148  
149  
150  
151  
152  
153  
154  
155  
156  
157  
158  
159  
160  
161  
162  
163  
164  
165  
166  
167  
168  
169  
170  
171  
172  
173  
174  
175  
176  
177  
178  
179  
180  
181  
182  
183  
184  
185  
186  
187  
188  
189  
190  
191  
192  
193  
194  
195  
196  
197  
198  
199  
200  
201  
202  
203  
204  
205  
206  
207  
208  
209  
210  
211  
212  
213  
214  
215  
216  
217  
218  
219  
220  
221  
222  
223  
224  
225  
226  
227  
228  
229  
230  
231  
232  
233  
234  
235  
236  
237  
238  
239  
240  
241  
242  
243  
244  
245  
246  
247  
248  
249  
250  
251  
252  
253  
254  
255  
256  
257  
258  
259  
260  
261  
262  
263  
264  
265  
266  
267  
268  
269  
270  
271  
272  
273  
274  
275  
276  
277  
278  
279  
280  
281  
282  
283  
284  
285  
286  
287  
288  
289  
290  
291  
292  
293  
294  
295  
296  
297  
298  
299  
300  
301  
302  
303  
304  
305  
306  
307  
308  
309  
310  
311  
312  
313  
314  
315  
316  
317  
318  
319  
320  
321  
322  
323  
324  
325  
326  
327  
328  
329  
330  
331  
332  
333  
334  
335  
336  
337  
338  
339  
340  
341  
342  
343  
344  
345  
346  
347  
348  
349  
350  
351  
352  
353  
354  
355  
356  
357  
358  
359  
360  
361  
362  
363  
364  
365  
366  
367  
368  
369  
370  
371  
372  
373  
374  
375  
376  
377  
378  
379  
380  
381  
382  
383  
384  
385  
386  
387  
388  
389  
390  
391  
392  
393  
394  
395  
396  
397  
398  
399  
400  
401  
402  
403  
404  
405  
406  
407  
408  
409  
410  
411  
412  
413  
414  
415  
416  
417  
418  
419  
420  
421  
422  
423  
424  
425  
426  
427  
428  
429  
430  
431  
432  
433  
434  
435  
436  
437  
438  
439  
440  
441  
442  
443  
444  
445  
446  
447  
448  
449  
450  
451  
452  
453  
454  
455  
456  
457  
458  
459  
460  
461  
462  
463  
464  
465  
466  
467  
468  
469  
470  
471  
472  
473  
474  
475  
476  
477  
478  
479  
480  
481  
482  
483  
484  
485  
486  
487  
488  
489  
490  
491  
492  
493  
494  
495  
496  
497  
498  
499  
500  
501  
502  
503  
504  
505  
506  
507  
508  
509  
510  
511  
512  
513  
514  
515  
516  
517  
518  
519  
520  
521  
522  
523  
524  
525  
526  
527  
528  
529  
530  
531  
532  
533  
534  
535  
536  
537  
538  
539  
540  
541  
542  
543  
544  
545  
546  
547  
548  
549  
550  
551  
552  
553  
554  
555  
556  
557  
558  
559  
560  
561  
562  
563  
564  
565  
566  
567  
568  
569  
570  
571  
572  
573  
574  
575  
576  
577  
578  
579  
580  
581  
582  
583  
584  
585  
586  
587  
588  
589  
590  
591  
592  
593  
594  
595  
596  
597  
598  
599  
600  
601  
602  
603  
604  
605  
606  
607  
608  
609  
610  
611  
612  
613  
614  
615  
616  
617  
618  
619  
620  
621  
622  
623  
624  
625  
626  
627  
628  
629  
630  
631  
632  
633  
634  
635  
636  
637  
638  
639  
640  
641  
642  
643  
644  
645  
646  
647  
648  
649  
650  
651  
652  
653  
654  
655  
656  
657  
658  
659  
660  
661  
662  
663  
664  
665  
666  
667  
668  
669  
670  
671  
672  
673  
674  
675  
676  
677  
678  
679  
680  
681  
682  
683  
684  
685  
686  
687  
688  
689  
690  
691  
692  
693  
694  
695  
696  
697  
698  
699  
700  
701  
702  
703  
704  
705  
706  
707  
708  
709  
710  
711  
712  
713  
714  
715  
716  
717  
718  
719  
720  
721  
722  
723  
724  
725  
726  
727  
728  
729  
730  
731  
732  
733  
734  
735  
736  
737  
738  
739  
740  
741  
742  
743  
744  
745  
746  
747  
748  
749  
750  
751  
752  
753  
754  
755  
756  
757  
758  
759  
760  
761  
762  
763  
764  
765  
766  
767  
768  
769  
770  
771  
772  
773  
774  
775  
776  
777  
778  
779  
780  
781  
782  
783  
784  
785  
786  
787  
788  
789  
790  
791  
792  
793  
794  
795  
796  
797  
798  
799  
800  
801  
802  
803  
804  
805  
806  
807  
808  
809  
810  
811  
812  
813  
814  
815  
816  
817  
818  
819  
820  
821  
822  
823  
824  
825  
826  
827  
828  
829  
830  
831  
832  
833  
834  
835  
836  
837  
838  
839  
840  
841  
842  
843  
844  
845  
846  
847  
848  
849  
850  
851  
852  
853  
854  
855  
856  
857  
858  
859  
860  
861  
862  
863  
864  
865  
866  
867  
868  
869  
870  
871  
872  
873  
874  
875  
876  
877  
878  
879  
880  
881  
882  
883  
884  
885  
886  
887  
888  
889  
890  
891  
892  
893  
894  
895  
896  
897  
898  
899  
900  
901  
902  
903  
904  
905  
906  
907  
908  
909  
910  
911  
912  
913  
914  
915  
916  
917  
918  
919  
920  
921  
922  
923  
924  
925  
926  
927  
928  
929  
930  
931  
932  
933  
934  
935  
936  
937  
938  
939  
940  
941  
942  
943  
944  
945  
946  
947  
948  
949  
950  
951  
952  
953  
954  
955  
956  
957  
958  
959  
960  
961  
962  
963  
964  
965  
966  
967  
968  
969  
970  
971  
972  
973  
974  
975  
976  
977  
978  
979  
980  
981  
982  
983  
984  
985  
986  
987  
988  
989  
990  
991  
992  
993  
994  
995  
996  
997  
998  
999  
1000



**TRIAL STATUS**

As of 25 October 2018, this trial is actively recruiting patients in 3 centers with additional centers planned. Two hundred of the planned 600 participants have been enrolled.

For peer review only

## **AUTHORS' CONTRIBUTIONS**

Masashi Takeuchi and Hideaki Obara contributed equally to this study. All authors made significant contribution to the conception and design of the study protocol. MT designed the study and wrote the protocol and manuscript. The protocol was reviewed by HO, HK, MS, KO, and YK. YS wrote the statistical analysis plan. All authors gave final approval of the manuscript and agree to be accountable for all aspects of the work.

## **FUNDING**

This work was supported by donations from the Department of Surgery, Keio University School of Medicine and Ohyama Health Foundation, Inc.

## **DISCLAIMER**

Otsuka Pharmaceutical Factory, Inc. was not involved in the planning of the protocol or in the conduct of the trial.

## **COMPETING INTERESTS**

YK received grant support from Otsuka Pharmaceutical Factory, Inc.

## **ETHICS APPROVAL**

The protocol was firstly approved by the Institutional Review Board of Keio University School of Medicine, and then approved by the institutional review board of each participating site.

## **ACKNOWLEDGMENTS**

The authors thank Asako Inoue and Kumiko Motooka, staff members of the Department of Surgery in Keio University School of Medicine, for their help in the preparation of this manuscript.

## REFERENCES

1. Berríos-Torres SI, Umscheid CA, Bratzler DW, et al: Centers for Disease Control and Prevention Guideline for the Prevention of Surgical Site Infection, 2017. *JAMA Surgery* 152:784-791, 2017
2. Steiner HL, Strand EA: Surgical-site infection in gynecologic surgery: pathophysiology and prevention. *Am J Obstet Gynecol* 217:121-128, 2017
3. López Pereira P, Díaz-Agero Pérez C, López Fresneña N, et al: 'Epidemiology of surgical site infection in a neurosurgery department'. *Br J Neurosurg* 31:10-15, 2016
4. Figuerola-Tejerina A, Rodríguez-Caravaca G, Bustamante-Munguira J, et al: Epidemiological Surveillance of Surgical Site Infection and its Risk Factors in Cardiac Surgery: A Prospective Cohort Study. *Rev Esp Cardiol (Engl Ed)* 69:842-848, 2016
5. Maehara Y, Shirabe K, Kohnoe S, et al: Impact of intra-abdominal absorbable sutures on surgical site infection in gastrointestinal and hepato-biliary-pancreatic surgery: results of a multicenter, randomized, prospective, phase II clinical trial. *Surg Today* 47:1060-1071, 2017
6. Kirkland KB, Briggs, JP, Trivette, S, et al: The Impact of Surgical-Site Infections in the 1990s: Attributable Mortality, Excess Length of Hospitalization, And Extra Costs. *Infect Control Hosp Epidemiol* 20: 725-730. 1999
7. de Lissovoy G, Fraeman K, Hutchins V, et al: Surgical site infection: incidence and impact on hospital utilization and treatment costs. *Am J Infect Control* 37:387-397, 2009
8. Allegranzi B, Bischoff P, de Jonge S, et al: New WHO recommendations on preoperative measures for surgical site infection prevention: an evidence-based global perspective. *Lancet Infect Dis* 16:e276-e287, 2016
9. Srinivas A, Kaman L, Raj P, et al: Comparison of the efficacy of chlorhexidine gluconate versus povidone iodine as preoperative skin preparation for the prevention of surgical site infections in clean-contaminated upper abdominal surgeries. *Surg Today* 45:1378-1384, 2015
10. Springel EH, Wang XY, Sarfoh VM, et al: A randomized open-label controlled trial of chlorhexidine-alcohol vs povidone-iodine for cesarean antisepsis: the CAPICA trial. *Am J Obstet Gynecol* 217:463 e1-463 e8, 2017
11. Darouiche RO, Wall MJ Jr., Itani KM, et al: Chlorhexidine-Alcohol versus Povidone-Iodine for Surgical-Site Antisepsis. *N Engl J Med* 362:18-26, 2010
12. Park HM, Han SS, Lee EC, et al: Randomized clinical trial of preoperative skin antisepsis with chlorhexidine gluconate or povidone-iodine. *Br J Surg* 104:e145-e150, 2017

- 1  
2  
3  
4  
5  
6  
7  
8  
9  
10  
11  
12  
13  
14  
15  
16  
17  
18  
19  
20  
21  
22  
23  
24  
25  
26  
27  
28  
29  
30  
31  
32  
33  
34  
35  
36  
37  
38  
39  
40  
41  
42  
43  
44  
45  
46  
47  
48  
49  
50  
51  
52  
53  
54  
55  
56  
57  
58  
59  
60
13. National Institute for Health and Clinical Excellence (NICE). Surgical Site Infection: Prevention and Treatment of Surgical Site Infection (NICE Clinical Guideline 74). 2008
14. Burlingame B DB, Link T, et al: Guideline for Preoperative Patient Skin Antisepsis. In: Connor R, ed. AORN Guidelines for Perioperative Practice. Denver, CO: Association of periOperative Registered, Nurses; 2016.
15. Kobayashi H, Tsuzuki M, Hosobuchi K. Bactericidal effects of antiseptics and disinfectants against methicillin-resistant *Staphylococcus aureus*. *Infect Control Hosp Epidemiol* 10:562-564, 1989.
16. Kampf G, Hofer M, Wendt C. Efficacy of hand disinfectants against vancomycin-resistant enterococci in vitro. *J Hosp Infect* 42:143–150, 1999.
17. Zamora JL Price MF, Chuang P, et al: Inhibition of povidone-iodine's bactericidal activity by common organic substances: an experimental study. *Surgery* 98:25–29,1985.
18. Inoue Y, Hagi A, Nii T, et al: Novel antiseptic compound OPB-2045G shows potent bactericidal activity against methicillin-resistant *Staphylococcus aureus* and vancomycin-resistant *Enterococcus* both in vitro and in vivo: a pilot study in animals. *J Med Microbiol* 64:32-36, 2015
19. Hagi A, Iwata K, Nii T, et al: Bactericidal Effects and Mechanism of Action of Olanexidine Gluconate, a New Antiseptic. *Antimicrob Agents and Chemother* 59:4551-4559, 2015
20. Howard DP, Datta G, Cunnick G, et al: Surgical site infection rate is lower in laparoscopic than open colorectal surgery. *Colorectal Dis* 12:423-7, 2010.

1  
2  
3  
4 **FIGURE LEGEND**  
5

6  
7 Figure 1  
8

9  
10  
11 The definition of wound classes.  
12  
13  
14  
15  
16  
17  
18  
19  
20  
21  
22  
23  
24  
25  
26  
27  
28  
29  
30  
31  
32  
33  
34  
35  
36  
37  
38  
39  
40  
41  
42  
43  
44  
45  
46  
47  
48  
49  
50  
51  
52  
53  
54  
55  
56  
57  
58  
59  
60

For peer review only

Figure 1

| Wound Class                   | Definition                                                                                                                                                    |
|-------------------------------|---------------------------------------------------------------------------------------------------------------------------------------------------------------|
| Class I (Clean)               | An uninfected operative wound in which no inflammation is encountered and the respiratory, alimentary, genital, or uninfected urinary tracts are not entered. |
| Class II (Clean-contaminated) | Operative wounds in which the respiratory, alimentary, genital, or urinary tracts are entered under controlled conditions and without unusual contamination.  |
| Class III (Contaminated)      | Includes open, fresh, accidental wounds.                                                                                                                      |
| Class IV (Dirty-contaminated) | Includes old traumatic wounds with retained devitalized tissue and those that involve existing clinical infection or perforated viscera.                      |

Figure 1  
The definition of wound classes.

338x190mm (200 x 200 DPI)

# BMJ Open

## Comparison of olanexidine versus povidone-iodine for preventing surgical site infection in gastrointestinal surgery: study protocol for a multicenter, single-blind, randomized controlled clinical trial

|                               |                                                                                                                                                                                                                                                                                                                                                                                                                                                                                                                                                                                                                                                                                                                                                                                                                                                                                                                                                                                                                                                                                                                                                                                                                                                                                                                                                                                                                                                                                                                                                                                                                                                                                                                                                                                                                                                                                                                                                                                                                                                                                                                              |
|-------------------------------|------------------------------------------------------------------------------------------------------------------------------------------------------------------------------------------------------------------------------------------------------------------------------------------------------------------------------------------------------------------------------------------------------------------------------------------------------------------------------------------------------------------------------------------------------------------------------------------------------------------------------------------------------------------------------------------------------------------------------------------------------------------------------------------------------------------------------------------------------------------------------------------------------------------------------------------------------------------------------------------------------------------------------------------------------------------------------------------------------------------------------------------------------------------------------------------------------------------------------------------------------------------------------------------------------------------------------------------------------------------------------------------------------------------------------------------------------------------------------------------------------------------------------------------------------------------------------------------------------------------------------------------------------------------------------------------------------------------------------------------------------------------------------------------------------------------------------------------------------------------------------------------------------------------------------------------------------------------------------------------------------------------------------------------------------------------------------------------------------------------------------|
| Journal:                      | <i>BMJ Open</i>                                                                                                                                                                                                                                                                                                                                                                                                                                                                                                                                                                                                                                                                                                                                                                                                                                                                                                                                                                                                                                                                                                                                                                                                                                                                                                                                                                                                                                                                                                                                                                                                                                                                                                                                                                                                                                                                                                                                                                                                                                                                                                              |
| Manuscript ID                 | bmjopen-2018-028269.R1                                                                                                                                                                                                                                                                                                                                                                                                                                                                                                                                                                                                                                                                                                                                                                                                                                                                                                                                                                                                                                                                                                                                                                                                                                                                                                                                                                                                                                                                                                                                                                                                                                                                                                                                                                                                                                                                                                                                                                                                                                                                                                       |
| Article Type:                 | Protocol                                                                                                                                                                                                                                                                                                                                                                                                                                                                                                                                                                                                                                                                                                                                                                                                                                                                                                                                                                                                                                                                                                                                                                                                                                                                                                                                                                                                                                                                                                                                                                                                                                                                                                                                                                                                                                                                                                                                                                                                                                                                                                                     |
| Date Submitted by the Author: | 15-Jan-2019                                                                                                                                                                                                                                                                                                                                                                                                                                                                                                                                                                                                                                                                                                                                                                                                                                                                                                                                                                                                                                                                                                                                                                                                                                                                                                                                                                                                                                                                                                                                                                                                                                                                                                                                                                                                                                                                                                                                                                                                                                                                                                                  |
| Complete List of Authors:     | <p>Takeuchi, Masashi; Keio University School of Medicine Graduate School of Medicine Department of Surgery<br/> Obara, Hideaki; Keio University School of Medicine Graduate School of Medicine Department of Surgery,<br/> Kawakubo, Hirofumi ; Keio University School of Medicine Graduate School of Medicine Department of Surgery<br/> Shinoda, Masahiro ; Keio University School of Medicine Graduate School of Medicine Department of Surgery<br/> Okabayashi, Koji ; Keio University School of Medicine Graduate School of Medicine Department of Surgery<br/> Mayanagi, Shuhei ; Keio University School of Medicine Graduate School of Medicine Department of Surgery<br/> Irinno, Tomoyuki; Keio University School of Medicine Graduate School of Medicine Department of Surgery<br/> Fukuda, Kazumasa; Keio University School of Medicine Graduate School of Medicine Department of Surgery<br/> Nakamura, Rieko; Keio University School of Medicine Graduate School of Medicine Department of Surgery<br/> Wada, Norihito ; Keio University School of Medicine Graduate School of Medicine Department of Surgery<br/> Kitago, Minoru ; Keio University School of Medicine Graduate School of Medicine Department of Surgery<br/> Yagi, Hiroshi ; Keio University School of Medicine Graduate School of Medicine Department of Surgery<br/> Abe, Yuta; Keio University School of Medicine Graduate School of Medicine Department of Surgery<br/> Oshima, Go ; Keio University School of Medicine Graduate School of Medicine Department of Surgery<br/> Hori, Shutaro ; Keio University School of Medicine Graduate School of Medicine Department of Surgery<br/> Tsuruta, Masashi ; Keio University School of Medicine Graduate School of Medicine Department of Surgery<br/> Ishida, Takashi ; Keio University School of Medicine Graduate School of Medicine Department of Surgery<br/> Yokose, Takahiro ; Keio University School of Medicine Graduate School of Medicine Department of Surgery<br/> Hirukawa, Kazuya ; Keio University School of Medicine Graduate School of Medicine Department of Surgery</p> |



|                                 |                                                                                                                                                                                                                                                                                                                                                                                                                                                                                                                                                                                                                                                                                                                       |
|---------------------------------|-----------------------------------------------------------------------------------------------------------------------------------------------------------------------------------------------------------------------------------------------------------------------------------------------------------------------------------------------------------------------------------------------------------------------------------------------------------------------------------------------------------------------------------------------------------------------------------------------------------------------------------------------------------------------------------------------------------------------|
|                                 | Isobe, Yoh; Department of surgery, National Hospital Organization Tokyo Medical Center<br>Sekimoto, Yasuhito ; Department of surgery, National Hospital Organization Tokyo Medical Center<br>Harada, Hirohisa ; Department of Surgery, Tokyo Saiseikai Central Hospital<br>Maeda, Yusuke ; Department of Surgery, Tokyo Saiseikai Central Hospital<br>Shito, Masaya ; Department of Surgery, Kawasaki Municipal Hospital<br>Kondo, Takayuki ; Department of Surgery, Kawasaki Municipal Hospital<br>Sato, Yasunori ; Department of Preventive Medicine and Public Health, Keio University School of Medicine<br>Kitagawa, Yuko ; Keio University School of Medicine Graduate School of Medicine Department of Surgery |
| <b>Primary Subject Heading</b>: | Surgery                                                                                                                                                                                                                                                                                                                                                                                                                                                                                                                                                                                                                                                                                                               |
| Secondary Subject Heading:      | Gastroenterology and hepatology                                                                                                                                                                                                                                                                                                                                                                                                                                                                                                                                                                                                                                                                                       |
| Keywords:                       | WOUND MANAGEMENT, SURGERY, Gastrointestinal infections < GASTROENTEROLOGY                                                                                                                                                                                                                                                                                                                                                                                                                                                                                                                                                                                                                                             |
|                                 |                                                                                                                                                                                                                                                                                                                                                                                                                                                                                                                                                                                                                                                                                                                       |

SCHOLARONE™  
Manuscripts

1  
2  
3  
4 **1 Comparison of olanexidine versus povidone-iodine for preventing surgical site infection**  
5  
6  
7 **2 in gastrointestinal surgery: study protocol for a multicenter, single-blind, randomized**  
8  
9  
10 **3 controlled clinical trial**

14 Masashi Takeuchi, M.D.<sup>1</sup>; Hideaki Obara, M.D., Ph.D.<sup>1</sup>; Hirofumi Kawakubo, M.D., Ph.D.<sup>1</sup>;  
15  
16  
17 Masahiro Shinoda, M.D., Ph.D.<sup>1</sup>; Koji Okabayashi, M.D., Ph.D.<sup>1</sup>; Shuhei Mayanagi, M.D.,  
18  
19  
20 Ph.D.<sup>1</sup>; Tomoyuki Irino, M.D., Ph.D.<sup>1</sup>; Kazumasa Fukuda, Ph.D.<sup>1</sup>; Rieko Nakamura, M.D.,  
21  
22  
23 Ph.D.<sup>1</sup>; Norihito Wada, M.D., Ph.D.<sup>1</sup>; Minoru Kitago, M.D., Ph.D.<sup>1</sup>; Hiroshi Yagi, M.D.,  
24  
25  
26 Ph.D.<sup>1</sup>; Yuta Abe, M.D., Ph.D.<sup>1</sup>; Go Oshima, M.D., Ph.D.<sup>1</sup>; Shutaro Hori, M.D., Ph.D.<sup>1</sup>;  
27  
28  
29 Masashi Tsuruta, M.D., Ph.D.<sup>1</sup>; Takashi Ishida, M.D., Ph.D.<sup>1</sup>; Takahiro Yokose, M.D.<sup>1</sup>;  
30  
31  
32 Kazuya Hirukawa, M.D.<sup>1</sup>; Yoh Isobe, M.D., Ph.D.<sup>2</sup>; Yasuhito Sekimoto, M.D.<sup>2</sup>; Hirohisa  
33  
34  
35 Harada, M.D., Ph.D.<sup>3</sup>; Yusuke Maeda, M.D.<sup>3</sup>; Masaya Shito, M.D., Ph.D.<sup>4</sup>; Takayuki Kondo,  
36  
37  
38 M.D.<sup>4</sup>; Yasunori Sato, Ph.D.<sup>5</sup>; and Yuko Kitagawa, M.D., Ph.D.<sup>1</sup>

39  
40  
41  
42  
43  
44 <sup>1</sup>Department of Surgery, Keio University School of Medicine, 35 Shinanomachi,  
45  
46  
47 Shinjuku-ku, Tokyo 160-8582, Japan  
48  
49

50  
51 <sup>2</sup>Department of Surgery, National Hospital Organization Tokyo Medical Center, 2-5-1  
52  
53  
54 Higashigaoka, Meguro-ku, Tokyo 152-8902, Japan  
55

56  
57  
58 <sup>3</sup>Department of Surgery, Tokyo Saiseikai Central Hospital, 1-4-17 Mita, Minato-ku, Tokyo  
59  
60

1  
2  
3  
4 1 108-0073, Japan  
5  
6

7  
8 2 <sup>4</sup>Department of Surgery, Kawasaki Municipal Hospital, 12-1 Shinkawadori, Kawasaki-ku,  
9

10  
11 3 Kawasaki-shi, Kanagawa 210-0013, Japan  
12  
13

14 4 <sup>5</sup>Department of Preventive Medicine and Public Health, Keio University School of Medicine,  
15

16  
17 5 35 Shinanomachi, Shinjuku-ku, Tokyo 160-8582, Japan  
18  
19

20  
21 6 **Corresponding author:** Hideaki Obara, M.D., Ph.D.  
22

23  
24 7 Department of Surgery, Keio University School of Medicine, 35 Shinanomachi, Shinjuku-ku,  
25

26  
27 8 Tokyo 160-8582, Japan  
28  
29

30  
31 9 E-mail: [obara.z3@keio.jp](mailto:obara.z3@keio.jp)  
32

33  
34 10 Tel: +81-3-3353-1211; Fax: +81-3-3755-4707  
35  
36

37  
38 11 **Word count:** 2778  
39  
40  
41  
42  
43  
44  
45  
46  
47  
48  
49  
50  
51  
52  
53  
54  
55  
56  
57  
58  
59  
60

1

2 **ABSTRACT**

3 **Introduction:** The prevalence of surgical site infection (SSI) remains higher in  
4 gastrointestinal surgery than in other surgeries. Although several guidelines have indicated  
5 the efficacy of chlorhexidine and povidone-iodine in reducing the SSI rate, the optimal  
6 recommendation has still not been established. Therefore, it is necessary to determine the  
7 more effective antiseptic for surgical site preparation. Olanexidine (1.5% Olanedine<sup>®</sup>, Otsuka  
8 Pharmaceutical Factory, Inc., Tokushima, Japan), which is a new antiseptic in Japan, has  
9 antimicrobial activity against a wide range of bacteria, including gram-positive bacteria and  
10 gram-negative bacteria. Our study will contribute to determining a new antiseptic for use in  
11 gastrointestinal and other surgeries.

12 **Methods and analysis:** We propose a multicenter, randomized controlled clinical trial for  
13 comparing two treatments, i.e., 1.5% olanexidine or 10% povidone-iodine, for surgical skin  
14 preparation to prevent SSI in clean-contaminated gastrointestinal surgeries with surgical  
15 wounds. Patients aged  $\geq 20$  years at the time of consent will be included. The primary  
16 outcome measure is the 30-day postoperative SSI rate. For the primary analysis, which is

1  
2  
3  
4 1 aimed at comparing the treatment effects, the adjusted risk ratio and its 95% confidence  
5  
6  
7  
8 2 interval will be estimated using the Mantel-Haenszel method.  
9

10  
11 3 **Ethics and dissemination:** The protocol was first approved by the Institutional Review  
12  
13  
14 4 Board of Keio University School of Medicine, followed by the institutional review board of  
15  
16  
17  
18 5 each participating site. Participant recruitment began in June 2018. The final results will be  
19  
20  
21 6 published in international peer-reviewed medical journals.  
22

23  
24 7 **Trial registration number:** UMIN 000031560  
25  
26  
27  
28 8 ([https://upload.umin.ac.jp/cgi-open-bin/ctr\\_e/ctr\\_view.cgi?recptno=R000036031](https://upload.umin.ac.jp/cgi-open-bin/ctr_e/ctr_view.cgi?recptno=R000036031))  
29  
30  
31  
32  
33  
34  
35  
36  
37  
38  
39  
40  
41  
42  
43  
44  
45  
46  
47  
48  
49  
50  
51  
52  
53  
54  
55  
56  
57  
58  
59  
60

1

2 **Article Summary**3 **Strengths and limitations of this study**

4 • This is the first study to evaluate the effect of olanexidine, which has been  
5 commercially available since 2015 in Japan.

6 • The study design is a multicenter, single-blind, randomized controlled clinical trial.

7 • The primary outcome measure is the 30-day postoperative SSI rate.

8 • This study is limited to a Japanese population, which could introduce an element of  
9 selection bias, because olanexidine is only commercially available in Japan.

1  
2  
3  
4 1  
5  
6  
78 **2 INTRODUCTION**  
9

10 3 Surgical site infection (SSI) is one of the most common nosocomial infections in surgical  
11  
12  
13  
14 4 patients.<sup>1</sup> Especially, the rate of SSI is higher in gastrointestinal surgery than in other  
15  
16  
17 5 surgeries, such as cardiothoracic surgery, gynecologic surgery, and neurosurgery,<sup>2-4</sup> and it has  
18  
19  
20  
21 6 been reported that 10% to 30% of patients suffer from SSI after gastrointestinal surgery.<sup>5</sup> SSI  
22  
23  
24 7 not only causes prolonged hospitalization and delay of postoperative therapy, but it also  
25  
26  
27 8 causes increased medical costs—\$1300-5000 per person for inpatient treatment including  
28  
29  
30  
31 9 antibiotic therapy.<sup>6,7</sup> Therefore, prevention of SSI is extremely important to both the patient  
32  
33  
34 10 and all medical practitioners involved in the surgery.

35  
36  
37 11 Many perioperative measures for decreasing SSI have been reported, including enhanced  
38  
39  
40  
41 12 nutritional support, perioperative oxygenation, surgical technique, wound dressing, and use  
42  
43  
44 13 of an antimicrobial agent.<sup>1,8</sup> Surgical site preparation is one of the useful procedures for  
45  
46  
47 14 preventing SSI because microorganisms are removed from the skin. Thus far, two types of  
48  
49  
50  
51 15 preparations, povidone-iodine and chlorhexidine-alcohol,<sup>9-12</sup> have been commonly used as  
52  
53  
54 16 preoperative antiseptic procedures worldwide. The Centers for Disease Control and  
55  
56  
57 17 Prevention (CDC) guideline just recommends skin preparation with an alcohol-containing  
58  
59  
60

1 agent if there are no contraindications to its use, and other guidelines do not favor one  
2 antiseptic agent over another for skin preparation.<sup>1,13,14</sup> Both preparations have  
3 broad-spectrum antibacterial effectiveness; however, povidone-iodine is known to decrease  
4 its activity under the presence of organic materials including blood or pus.<sup>15</sup> On the other  
5 hand, chlorhexidine-alcohol has high antibacterial activity against some pathogens, such as  
6 methicillin-resistant *Staphylococcus aureus* (MRSA)<sup>15</sup> and vancomycin-resistant enterococci  
7 (VRE); nevertheless, it is associated with inflammability, more expensive than  
8 povidone-iodine, and has been linked to allergic reactions.<sup>16,17</sup> Therefore, it is necessary to  
9 determine the more effective antiseptic for surgical site preparation.

10 Olanexidine (1.5% Olanedine®; Otsuka Pharmaceutical Factory, Inc., Tokushima, Japan),  
11 which is a new antiseptic, is one of the biguanide bactericidal disinfectants that contains  
12 olanexidine gluconate as its active ingredient.<sup>18,19</sup> It has been commercially available since  
13 2015 in Japan. It can disrupt membrane integrity by binding to the cell membrane; this results  
14 in irreversible leakage of intracellular components, and its bactericidal and fungicidal  
15 activities are exerted.<sup>18</sup> Olanexidine has antimicrobial activity against a wide range of  
16 bacteria, including gram-positive bacteria and gram-negative bacteria. Moreover, Inoue et al.  
17 reported that compared to chlorhexidine-alcohol and povidone-iodine, olanexidine showed



1 more potent bactericidal activity against MRSA and VRE both in vitro and in vivo.<sup>18</sup>

2 Therefore, the use of olanexidine is highly expected to lead to decreases in the SSI rate.

3 However, to date, no study has evaluated the effectiveness and safety of olanexidine

4 compared to conventional antiseptics in large-scale clinical trials.

5 In this multicenter, randomized controlled clinical trial, we aim to evaluate whether

6 olanexidine or povidone-iodine, which is the conventional skin antiseptic used in Japan, is

7 useful for preventing SSI in gastrointestinal surgery. We hypothesize that olanexidine will be

8 more useful for preventing SSI than povidone-iodine without increasing toxicity.

1  
2  
3  
4 15  
6  
7  
8 **2 METHODS**9  
10  
11 **3 Trial design**

12  
13  
14 4 This trial is a multi-center, prospective, randomized, blinded-endpoint trial (PROBE)  
15  
16  
17 5 designed to assess the efficacy of 1.5% olanexidine for surgical skin preparation for  
18  
19  
20  
21 6 preventing SSIs in gastrointestinal surgery. The trial was designed and will independently be  
22  
23  
24 7 conducted by Keio University with approval from the ethics committee of Keio University  
25  
26  
27 8 School of Medicine in accordance with the principals of the Declaration of Helsinki. All  
28  
29  
30 9 analyses will be conducted by Keio University, independent of the sponsor, according to the  
31  
32  
33  
34 10 prespecified statistical analysis plan (SAP). As a prospective randomized controlled trial, the  
35  
36  
37 11 study strategy will be constructed and presented in accordance with the recommendations of  
38  
39  
40  
41 12 the SPIRIT statement.  
42  
43  
44  
45  
46  
47  
48  
49  
50  
51  
52  
53  
54  
55  
56  
57  
58  
59  
60

14 **Eligibility criteria**

15 Eligible patients are those who meet all of the following inclusion criteria and who do not  
16 have any listed exclusion criteria.

- 17 • Inclusion criteria

1  
2  
3  
4 1 1) Scheduled to undergo elective gastrointestinal surgery involving the esophagus, stomach,  
5  
6  
7  
8 2 duodenum, small intestine, colorectal, liver, biliary tract, and pancreas that has a class II  
9  
10  
11 3 surgical wound (Table 1).

12  
13  
14 4 2) Age  $\geq 20$  years at the time of consent by non-blinded investigators.

15  
16  
17 5 3) Provision of written informed consent by the patient.

18  
19  
20  
21 6 • Exclusion criteria

22  
23  
24 7 1) Allergy to olanexidine gluconate or povidone-iodine.

25  
26  
27 8 2) Unable to undergo follow-up 30 days postoperatively.

28  
29  
30 9 3) Active bacterial infection at the time of informed consent (except for viral hepatitis).

31  
32  
33 10 4) Antimicrobial therapy on the day before surgery.

34  
35  
36  
37 11 5) Undergoing non-elective surgery or surgery requiring antisepsis of the mucosal surfaces or  
38  
39  
40  
41 12 surgical wound sites.

42  
43  
44 13 6) Unsuitable conditions for safe conduct of this trial according to the non-blinded  
45  
46  
47  
48 14 investigators.

49  
50  
51 15

52  
53  
54 16 **Intervention**

55  
56  
57 17 Study arm A (experimental group): Surgical skin antisepsis with an aqueous formulation of  
58  
59  
60

1 1.5% olanexidine is administered just before gastrointestinal surgery.

2 Study arm B (control group): Surgical skin antiseptics with an aqueous formulation of 10%  
3 povidone-iodine is administered just before gastrointestinal surgery.

4

#### 5 **Treatment protocol**

6 The antiseptics should be applied widely in consideration of the drain site and length of the  
7 skin incision. We apply agents from the papilla (in cases of esophageal surgery; the neck)  
8 with a cranial limit and to the upper thigh with a caudal limit. After waiting 3 minutes to  
9 allow the antiseptics to dry, the operation is started. In study arm A, one olanexidine  
10 applicator will be used in surgery; however, if surgeons determine that disinfection is  
11 inadequate, an additional applicator can be added.

12 We used other measures to prevent SSI in our protocol as follows:

13 (1) Administer standard antibiotic prophylaxis before making the surgical incision,

14 (2) use absorbable sutures for wound closure and recommend the use of  
15 antimicrobial-coated sutures,

16 (3) recommend the use of a wound protector,

17 (4) recommend wound irrigation,

- 1 (5) use any type of immunosuppressive agent,
- 2 (6) change or retain the same gloves during the operation, and
- 3 (7) change or retain the surgical instruments.

4 Furthermore, we always maintain a normal body temperature by using warming devices  
5 during surgery, and do not perform hair removal before surgery.

## 6 **Recruitment of study participants**

7 The trial protocol (October 24, 2018, version 1.3) was approved by each participating  
8 institution's institutional review board and registered in the University Hospital Medical  
9 Information Network Clinical Trials Registry (number UMIN 000031560). Recruitment into  
10 the trial started in June 2018 and will continue until 600 participants are registered. All  
11 participants who meet the inclusion criteria will receive a participant information sheet from  
12 investigators before giving written informed consent. This study is being conducted in 4  
13 general centers: Keio University Hospital (Tokyo, Japan), National Hospital Organization  
14 Tokyo Medical Center (Tokyo, Japan), Tokyo Saiseikai Central Hospital (Tokyo, Japan), and  
15 Kawasaki Municipal Hospital (Kanagawa, Japan).

## 17 **Randomization**

1  
2  
3  
4 1 Registration and allocation of participants are generated by non-blinded investigators using  
5  
6  
7  
8 2 the CapTool® Lite (Mebix, Inc., Tokyo, Japan). Eligible patients will be randomized to either  
9  
10  
11 3 surgical skin antiseptics with olanexidine (study arm A) or surgical skin antiseptics with  
12  
13  
14 4 povidone-iodine (study arm B) in a 1:1 replacement ratio. The random sequence will be  
15  
16  
17  
18 5 generated from computer-generated block randomization. We designated the factor of  
19  
20  
21 6 surgical approach (laparoscopy versus laparotomy) as the allocation adjustment factor  
22  
23  
24 7 because of evidence that there is a significantly higher SSI rate in laparotomy than in  
25  
26  
27  
28 8 laparoscopy.<sup>20</sup>  
29  
30  
31  
32  
33

## 34 **Blinding**

35  
36  
37 11 Both patients and investigators will be blinded to the assigned group. Although there is a  
38  
39  
40  
41 12 difference in color between povidone-iodine and olanexidine, it is feasible for patients to be  
42  
43  
44 13 masked because we wipe the stain of the antiseptic off their skin postoperatively.  
45  
46  
47  
48 14 Non-blinded investigators cannot be masked because they will be in the operating room when  
49  
50  
51 15 the antiseptic is used.  
52  
53  
54 16 Non-blinded investigators will answer the questionnaire about the wound condition; however,  
55  
56  
57  
58 17 they do not diagnose the presence or absence of SSI. SSIs are diagnosed by investigators who  
59  
60

1  
2  
3  
4 1 are blinded to the group allocation with reference to the questionnaire. Blinded investigators  
5  
6  
7  
8 2 perform data entry for diagnosis of SSI, and the data analyst is blinded.  
9

10  
11 3  
12

#### 13 14 4 **Trial visits**

15  
16  
17 5 Generally, patients are hospitalized 1 to 4 days before surgery. We obtain informed consent  
18  
19  
20  
21 6 and patients' background characteristics after admission. Informed consent for the operation  
22  
23  
24 7 and clinical trial is routinely obtained on the day before surgery. Thus, randomization is  
25  
26  
27 8 mainly performed on the day before surgery. The duration of observation will be 30 days  
28  
29  
30  
31 9 postoperatively. The schedule for the trial visits and data collection is summarized in Table 2.  
32

33  
34 10  
35  
36

#### 37 11 **Outcome measures**

38  
39  
40  
41 12 The non-blinded investigators will observe the surgical wound site daily during admission.  
42  
43  
44 13 After discharge, participants will undergo outpatient observation at least once if it is within  
45  
46  
47  
48 14 30 days postoperatively. Non-blinded investigators will observe the surgical wound in the  
49  
50  
51 15 same manner as during the hospital stay. We also recommend that patients visit the outpatient  
52  
53  
54 16 clinic or an emergency department if there are any symptoms suggestive of SSI such as pain  
55  
56  
57 17 or redness. If SSI is suspected based on the clinical findings, a microbiological culture would  
58  
59  
60

1 be collected using a cotton swab. The diagnosis of SSI will be determined by blinded  
2 investigators who will be unaware of the patients' group assignment. The investigator will  
3 verify the SSI via chart review by using the questionnaire for SSI provided by the  
4 non-blinded investigators in accordance with the CDC guideline. Moreover, blinded  
5 investigators will assess the seriousness of all adverse events and determine whether they are  
6 related to the study.

7 (1) Primary outcome measure

8 Postoperative 30-day SSI rate.

9 (2) Secondary outcome measures

10 Postoperative 30-day superficial incisional SSI rate, deep incisional SSI rate, organ/space SSI  
11 rate, rate of positive bacterial wound culture, bacterial strains, and rates of  
12 intervention-related toxicity and allergy events (e.g., erythema, pruritus, dermatitis, and other  
13 symptoms of allergy around the region disinfected by the antiseptic during surgery).

14  
15 **Definitions**

16 SSIs are classified as superficial incisional SSIs, deep incisional SSIs, and organ/space  
17 SSIs based on criteria in the CDC guidelines (Supplemental Table 1).<sup>1</sup>



1  
2  
3  
4 15  
6  
7  
8 **2 Data collection**

9  
10 3 All data will be collected and recorded into the web-based electric CRF (CapTool® Lite) by  
11  
12  
13  
14 4 the trial or non-blinded investigators. From the electric CRF, the trial database will be  
15  
16  
17  
18 5 established. Patients' characteristics, such as sex, age, smoking status, body mass index, the  
19  
20  
21 6 use of prophylactic antibiotics, mode of skin closure, comorbidities, such as diabetes  
22  
23  
24 7 mellitus, and steroid use, will be collected.

25  
26  
27 8 Data will also be collected regarding the surgical procedures such as the type of surgery, use  
28  
29  
30  
31 9 of laparoscopy, method of wound closure, type of prophylactic antiseptic agent, repeat  
32  
33  
34 10 application of an antiseptic agent, use of sterilized sutures for wound closure, amount of  
35  
36  
37  
38 11 intraperitoneal irrigation, amounts of wound irrigation and blood loss, and status of excision  
39  
40  
41 12 site into the electric CRF. We will confirm that personal identifying information such as  
42  
43  
44 13 patients' name and medical record identification are deleted from the data. Thereafter, a  
45  
46  
47  
48 14 linkable anonymized number is set and stored by a personal information manager for at least  
49  
50  
51 15 5 years after study completion.

52  
53  
54 1655  
56  
57 **17 Data monitoring**  
58  
59  
60

1  
2  
3  
4 1 Central monitoring will be conducted with the aim of ensuring that the trials are conducted  
5  
6  
7  
8 2 safely and in accordance with the implementation plan, and that the data collection is correct.  
9  
10  
11 3 It is conducted once a year, with 10% of registration completed in each institution. The  
12  
13  
14 4 number of consents acquired, number of patients registered, number of patients who  
15  
16  
17 5 withdraw or are loss to follow-up and their reasons, safety, compliance with eligibility  
18  
19  
20 6 criteria and exclusion criteria, accuracy of the allocation procedure, and compliance with  
21  
22  
23  
24 7 various regulations and research plan are all evaluated by test secretariat.  
25  
26  
27  
28 8  
29  
30

### 31 **9 Sample size calculation**

32  
33  
34 10 In our institution, the estimated proportions of SSI in gastrointestinal surgery with wound  
35  
36  
37 11 class II are 12% (this rate was only included in a non-published Japanese report) after  
38  
39  
40 12 povidone-iodine use and 6% after olanexidine use. Assuming a group difference of 6%  
41  
42  
43  
44 13 during the study period, 281 patients per group would provide a power over 80%, which is  
45  
46  
47  
48 14 sufficient for detecting a difference in the proportion of SSI between olanexidine and  
49  
50  
51 15 povidone-iodine using a one-sided, chi-square test at a 5% level of significance. A dropout  
52  
53  
54 16 rate of about 5% is allowed; thus, with 300 patients required per group, a total sample size of  
55  
56  
57  
58 17 600 patients is required for the trial.  
59  
60

1  
2  
3  
4 15  
6  
7  
8 2 **Patient and Public Involvement**9  
10  
11 3 Patients and the public were not involved in the design of this study.  
12  
13  
14 415  
16  
17 5 **Statistical analysis**

18  
19  
20 6 We will perform the primary analyses using the full analysis set, from which patients who  
21  
22 7 do not undergo surgery or who withdraw consent before assessment of the primary endpoint  
23  
24 8 are excluded. In addition, we will repeat the analyses in the per-protocol set, further  
25  
26 9 excluding patients with major protocol deviations. The safety analysis set will include all  
27  
28 10 patients who were randomly assigned to a study group and received treatment during the  
29  
30 11 study. For the baseline variables, summary statistics will be performed using frequencies and  
31  
32 12 proportions for categorical data, and means and standard deviations for continuous variables.  
33  
34 13 Patient characteristics will be compared using Pearson's chi-square test or Fisher's exact test  
35  
36 14 for categorical outcomes and Student's t-test for continuous variables, as appropriate. For the  
37  
38 15 primary analysis, which is aimed at comparing the treatment effects, the adjusted risk ratio  
39  
40 16 and its 95% confidence interval will be estimated using the Mantel-Haenszel method. To test  
41  
42 17 for a significant association of the primary outcome, the Mantel-Haenszel test will be applied  
43  
44 18 after adjusting for allocation factors. All comparisons are planned, and all *p*-values will be  
45  
46 19 two sided. *P*-values <0.05 will be considered statistically significant. All statistical analyses  
47  
48 20 will be performed using SAS software version 9.4 (SAS Institute, Cary, NC, USA). The SAP  
49  
50 21 will be developed by the principal investigator and the biostatistician before completion of  
51  
52 22 patient recruitment and data fixation.  
53  
54  
55  
56  
57  
58  
59  
60

1  
2  
3  
4 1  
5  
6  
7

8 **2 ETHICS AND DISSEMINATION**  
9

10  
11 3 Participant recruitment began in June 2018. The final results will be published in  
12  
13  
14 4 international peer-reviewed medical journals.  
15  
16  
17  
18  
19  
20  
21  
22  
23  
24  
25  
26  
27  
28  
29  
30  
31  
32  
33  
34  
35  
36  
37  
38  
39  
40  
41  
42  
43  
44  
45  
46  
47  
48  
49  
50  
51  
52  
53  
54  
55  
56  
57  
58  
59  
60

1

2 **DISCUSSION**

3 Although some guidelines have indicated the efficacy of chlorhexidine-alcohol and  
4 povidone-iodine for reducing the SSI rate, the optimal recommendation has still not been  
5 established, and the prevalence of SSI remains high in gastrointestinal surgery. Therefore, a  
6 comparative trial between conventional antiseptics, including chlorhexidine-alcohol and  
7 povidone-iodine, and newly antiseptics that considers their effectiveness, toxicity, and costs  
8 is needed.<sup>8</sup>

9 We have been conducting a randomized controlled clinical trial to compare olanexidine and  
10 povidone-iodine, which is the most popular antiseptic in Japan in terms of prevalence of SSI  
11 and toxicity. The strength in this trial is that we adopted blinding for diagnosing SSI in  
12 multiple centers. To maintain the quality of practices, only 4 centers, all of which are  
13 high-volume centers performing greater than 500 gastrointestinal surgeries per year, are  
14 participating in this trial. Furthermore, since the staff in each center belongs to the SSI  
15 control committee for providing unified and evidence-based counter measures against SSI in  
16 Keio University Hospital, the management of SSI in each center can be performed in almost  
17 the same manner.

1 In this study, we adopted povidone-iodine instead of chlorhexidine-alcohol as a control.  
2  
3  
4  
5  
6  
7  
8 2 Since inflammability is associated with chlorhexidine-alcohol, povidone-iodine is  
9  
10  
11 3 recommended and typically used for gastrointestinal surgery in Japan. In addition,  
12  
13  
14 4 chlorhexidine-alcohol with concentrations greater than 1% are not commercially available in  
15  
16  
17  
18 5 Japan, although a concentration greater than 2% is recognized as having a bactericidal effect  
19  
20  
21 6 in international guidelines.<sup>21-23</sup> Moreover, considering the influence of ethnic differences  
22  
23  
24 7 including intrinsic and extrinsic ethnic factors, this comparison is a meaningful examination  
25  
26  
27  
28 8 of SSI treatment at least in Japan. Therefore, we think that the selection of a control group is  
29  
30  
31 9 reasonable.  
32  
33

34 10 Although antiseptics would influence only superficial and deep SSIs, we included  
35  
36  
37  
38 11 organ-space SSI in the endpoint. As described earlier, this is the first study to use  
39  
40  
41 12 olanexidine; therefore, it is more important to establish evidence for all types of SSI than  
42  
43  
44 13 limiting the study to superficial and deep wound infections. Some studies have investigated  
45  
46  
47  
48 14 skin antiseptics in gastrointestinal surgery and included organ SSI as an outcome.<sup>11,12</sup>  
49

50  
51 15 This study has several limitations. First, this trial is recruiting patients with various types of  
52  
53  
54 16 gastrointestinal surgery, such as esophagectomy, gastrectomy, and cholecystectomy, and  
55  
56  
57  
58 17 there are differences in the prevalence of SSI according to the type of surgery. However,  
59  
60

1 there is no major bias in allocation because it is randomized. Furthermore, since this is the  
2 first report using olanexidine, it is more important to include various types of surgery than  
3 limiting the study to a particular type of surgery. Second, this study is limited to a Japanese  
4 population, which could introduce an element of selection bias, because olanexidine is only  
5 commercially available in Japan.

6 In conclusion, the present study is assessing the efficacy of olanexidine compared to  
7 povidone-iodine for preventing SSI in gastrointestinal surgery. We expect olanexidine to be  
8 more effective for preventing SSI than povidone-iodine without increasing toxicity. In the  
9 future, we should also consider conducting another trial that compares olanexidine to an  
10 alcohol-based antiseptic agent, if superiority of olanexidine compared to povidone-iodine is  
11 proven in this trial. Even if this expectation is not the predicted result, this trial can provide  
12 new knowledge in the aspect of antisepsis for preventing SSI. The result will also contribute  
13 to the development of new antisepsis treatment for gastrointestinal surgery.

1  
2  
3  
4 1  
5  
6  
7

8 **2 TRIAL STATUS**  
9

10  
11 3 As of 25 October 2018, this trial is actively recruiting patients in 3 centers with additional  
12  
13  
14 4 centers planned. Two hundred of the planned 600 participants have been enrolled.  
15  
16  
17  
18  
19  
20  
21  
22  
23  
24  
25  
26  
27  
28  
29  
30  
31  
32  
33  
34  
35  
36  
37  
38  
39  
40  
41  
42  
43  
44  
45  
46  
47  
48  
49  
50  
51  
52  
53  
54  
55  
56  
57  
58  
59  
60



1

## 2 **AUTHORS' CONTRIBUTIONS**

3 Masashi Takeuchi and Hideaki Obara contributed equally to this study. All authors made  
4 significant contribution to the conception and design of the study protocol. MT designed the  
5 study and wrote the protocol and manuscript. SM, TI, KF, RN, NW, MK, HY, YA, GO, SH,  
6 MT, TI, TY, KH, YI, YS, HH, YM, MS, and TK assisted with the development of the study  
7 design and protocol. The protocol was reviewed by HO, HK, MS, KO, and YK. YS wrote the  
8 statistical analysis plan. All authors gave final approval of the manuscript and agree to be  
9 accountable for all aspects of the work.

10

## 11 **FUNDING**

12 This work was supported by donations from the Department of Surgery, Keio University  
13 School of Medicine and Ohyama Health Foundation, Inc.

14

## 15 **DISCLAIMER**

16 Otsuka Pharmaceutical Factory, Inc. was not involved in the planning of the protocol or in  
17 the conduct of the trial.

1

**2    2    **COMPETING INTERESTS****

3    3    YK received grant support from Otsuka Pharmaceutical Factory, Inc.

4

**5    5    **ETHICS APPROVAL****

6    6    The protocol was firstly approved by the Institutional Review Board of Keio University

7    7    School of Medicine, and then approved by the institutional review board of each participating

8    8    site.

9

**10    10    **ACKNOWLEDGMENTS****

11    11    The authors thank Asako Inoue and Kumiko Motooka, staff members of the Department of

12    12    Surgery in Keio University School of Medicine, for their help in the preparation of this

13    13    manuscript.

1  
2  
3  
4 15  
6  
7  
8 2 **REFERENCES**

- 9  
10  
11 3 1. Berríos-Torres SI, Umscheid CA, Bratzler DW, et al: Centers for Disease Control  
12  
13  
14 4 and Prevention Guideline for the Prevention of Surgical Site Infection, 2017. *JAMA Surgery*  
15  
16  
17 5 152:784-791, 2017
- 18  
19  
20  
21 6 2. Steiner HL, Strand EA: Surgical-site infection in gynecologic surgery:  
22  
23  
24 7 pathophysiology and prevention. *Am J Obstet Gynecol* 217:121-128, 2017
- 25  
26  
27  
28 8 3. López Pereira P, Díaz-Agero Pérez C, López Fresneña N, et al: ‘Epidemiology of  
29  
30  
31 9 surgical site infection in a neurosurgery department’. *Br J Neurosurg* 31:10-15, 2016
- 32  
33  
34  
35 10 4. Figuerola-Tejerina A, Rodríguez-Caravaca G, Bustamante-Munguira J, et al:  
36  
37  
38 11 Epidemiological Surveillance of Surgical Site Infection and its Risk Factors in Cardiac  
39  
40  
41 12 Surgery: A Prospective Cohort Study. *Rev Esp Cardiol (Engl Ed)* 69:842-848, 2016
- 42  
43  
44  
45 13 5. Maehara Y, Shirabe K, Kohnoe S, et al: Impact of intra-abdominal absorbable  
46  
47  
48 14 sutures on surgical site infection in gastrointestinal and hepato-biliary-pancreatic surgery:  
49  
50  
51 15 results of a multicenter, randomized, prospective, phase II clinical trial. *Surg Today*  
52  
53  
54 16 47:1060-1071, 2017
- 55  
56  
57  
58 17 6. Kirkland KB, Briggs, JP, Trivette, S, et al: The Impact of Surgical-Site Infections  
59  
60

- 1  
2  
3  
4 1 in the 1990s: Attributable Mortality, Excess Length of Hospitalization, And Extra Costs.  
5  
6  
7 2 *Infect Control Hosp Epidemiol* 20: 725-730. 1999
- 8  
9  
10 3 7. de Lissovoy G, Fraeman K, Hutchins V, et al: Surgical site infection: incidence  
11  
12  
13  
14 4 and impact on hospital utilization and treatment costs. *Am J Infect Control* 37:387-397, 2009
- 15  
16  
17 5 8. Allegranzi B, Bischoff P, de Jonge S, et al: New WHO recommendations on  
18  
19  
20  
21 6 preoperative measures for surgical site infection prevention: an evidence-based global  
22  
23  
24 7 perspective. *Lancet Infect Dis* 16:e276-e287, 2016
- 25  
26  
27 8 9. Srinivas A, Kaman L, Raj P, et al: Comparison of the efficacy of chlorhexidine  
28  
29  
30  
31 9 gluconate versus povidone iodine as preoperative skin preparation for the prevention of  
32  
33  
34 10 surgical site infections in clean-contaminated upper abdominal surgeries. *Surg Today*  
35  
36  
37 11 45:1378-1384, 2015
- 38  
39  
40  
41 12 10. Springel EH, Wang XY, Sarfoh VM, et al: A randomized open-label controlled  
42  
43  
44 13 trial of chlorhexidine-alcohol vs povidone-iodine for cesarean antisepsis: the CAPICA trial.  
45  
46  
47 14 *Am J Obstet Gynecol* 217:463 e1-463 e8, 2017
- 48  
49  
50  
51 15 11. Darouiche RO, Wall MJ Jr., Itani KM, et al: Chlorhexidine-Alcohol versus  
52  
53  
54 16 Povidone-Iodine for Surgical-Site Antisepsis. *N Engl J Med* 362:18-26, 2010
- 55  
56  
57 17 12. Park HM, Han SS, Lee EC, et al: Randomized clinical trial of preoperative skin  
58  
59  
60

- 1  
2  
3  
4 1 antiseptics with chlorhexidine gluconate or povidone-iodine. *Br J Surg* 104:e145-e150, 2017  
5  
6  
7  
8 2 13. National Institute for Health and Clinical Excellence (NICE). Surgical Site  
9  
10  
11 3 Infection: Prevention and Treatment of Surgical Site Infection (NICE Clinical Guideline 74).  
12  
13  
14 4 2008  
15  
16  
17 5 14. Burlingame B DB, Link T, et al: Guideline for Preoperative Patient Skin  
18  
19  
20  
21 6 Antisepsis. In: Connor R, ed. AORN Guidelines for Perioperative Practice. Denver, CO:  
22  
23  
24 7 Association of periOperative Registered, Nurses; 2016  
25  
26  
27 8 15. Zamora JL Price MF, Chuang P, et al: Inhibition of povidone-iodine's  
28  
29  
30  
31 9 bactericidal activity by common organic substances: an experimental study. *Surgery*  
32  
33  
34 10 98:25-29, 1985  
35  
36  
37 11 16. Lee I, Agarwal RK, Lee BY, Fishman NO, Umscheid CA. Systematic review and  
38  
39  
40  
41 12 cost analysis comparing use of chlorhexidine with use of iodine for preoperative skin  
42  
43  
44 13 antiseptics to prevent surgical site infection. *Infect Control Hosp Epidemiol* 31:1219-1229,  
45  
46  
47 14 2010  
48  
49  
50  
51 15 17. Lim KS, Kam PC. Chlorhexidine — pharmacology and clinical applications.  
52  
53  
54 16 *Anaesth Intensive Care* 36:502-512, 2008  
55  
56  
57 17 18. Inoue Y, Hagi A, Nii T, et al: Novel antiseptic compound OPB-2045G shows  
58  
59  
60

1 potent bactericidal activity against methicillin-resistant *Staphylococcus aureus* and  
2 vancomycin-resistant *Enterococcus* both in vitro and in vivo: a pilot study in animals. *J Med*  
3 *Microbiol* 64:32-36, 2015

4 19. Hagi A, Iwata K, Nii T, et al: Bactericidal Effects and Mechanism of Action of  
5 Olanexidine Gluconate, a New Antiseptic. *Antimicrob Agents and Chemother* 59:4551-4559,  
6 2015

7 20. Howard DP, Datta G, Cunnick G, et al: Surgical site infection rate is lower in  
8 laparoscopic than open colorectal surgery. *Colorectal Dis* 12:423-7, 2010

9 21. Preventing surgical site infections. Key recommendations for practice. Dublin:  
10 Joint Royal College of Surgeons in Ireland/Royal Colleges of Physicians of Ireland Working  
11 Group on Prevention of Surgical Site Infection; 2012

12 22. Targeted literature review: What are the key infection prevention and control  
13 recommendations to inform a surgical site infection (SSI) prevention quality improvement  
14 tool? Version 3.0. February 2015. Edinburgh: Health Protection Scotland; 2015

15 23. High impact intervention: care bundle to prevent surgical site infection. London:  
16 Department of Health; 2011

17

1  
2  
3  
4 15  
6  
7  
8 29  
10  
11 3 **Table 1** The definition of wound classes  
12

---

| Wound Class                   | Definition                                                                                                                                                    |
|-------------------------------|---------------------------------------------------------------------------------------------------------------------------------------------------------------|
| Class I (Clean)               | An uninfected operative wound in which no inflammation is encountered and the respiratory, alimentary, genital, or uninfected urinary tracts are not entered. |
| Class II (Clean-contaminated) | Operative wounds in which the respiratory, alimentary, genital, or urinary tracts are entered under controlled conditions and without unusual contamination.  |
| Class III (Contaminated)      | Includes open, fresh, and accidental wounds.                                                                                                                  |
| Class IV (Dirty-contaminated) | Includes old traumatic wounds with retained devitalized tissue and those that involve existing clinical infection or perforated viscera.                      |

---

1

2 **Table 2** Flow chart of the trial

| Time point                           | After admission          | Before surgery           | Surgery                  | After surgery              |
|--------------------------------------|--------------------------|--------------------------|--------------------------|----------------------------|
| Informed consent                     | <input type="checkbox"/> |                          |                          |                            |
| Patients' background characteristics | <input type="checkbox"/> |                          |                          |                            |
| Physical examination                 | <input type="checkbox"/> |                          |                          |                            |
| Randomization                        |                          | <input type="checkbox"/> |                          |                            |
| Intervention                         |                          |                          | <input type="checkbox"/> |                            |
| Observation of the surgical site     |                          |                          |                          | <input type="checkbox"/> a |

3 a: From postoperative day 1 to postoperative day 30 (outpatient observation is performed at

4 least once if the discharge is within 30 days postoperatively)



**Supplemental Table1** Definitions of SSI

| Type of SSI                | Definition                                                                                                                                                                                                                                                                                                                                                                                                                                                                                                                                                                                                                                                                                                                                                                                                                                                                                            |
|----------------------------|-------------------------------------------------------------------------------------------------------------------------------------------------------------------------------------------------------------------------------------------------------------------------------------------------------------------------------------------------------------------------------------------------------------------------------------------------------------------------------------------------------------------------------------------------------------------------------------------------------------------------------------------------------------------------------------------------------------------------------------------------------------------------------------------------------------------------------------------------------------------------------------------------------|
| Superficial incisional SSI | <p>Superficial incisional SSI must meet the following three criteria (A, B, and C).</p> <p>A) Infection occurred within 30 days postoperatively.</p> <p>B) The infection affects only the incision in the skin and the subcutaneous tissue.</p> <p>C) At least one of the following is applicable:</p> <ul style="list-style-type: none"> <li>a. purulent drainage is observed from the superficial incision,</li> <li>b. organisms are identified from the superficial incision or subcutaneous tissue by a culture or non-culture based microbiologic testing method, and/or</li> <li>c. the superficial incision is deliberately opened by a nonblinded investigators, and culture or non-culture based testing is not performed.</li> </ul> <p>In addition, at least one of the following symptoms for infection must be applicable: pain, tenderness, localized swelling, erythema, or heat.</p> |
| Deep incisional SSI        | <p>Deep incisional SSI must meet the following three criteria (A, B, and C).</p> <p>A) Infection occurred within 30 days postoperatively.</p> <p>B) The infection reaches the deep soft tissues of the incision (fascia or muscle layer).</p> <p>C) At least one of the following is applicable:</p> <ul style="list-style-type: none"> <li>a. purulent drainage is observed from the deep incision,</li> <li>b. the deep incision spontaneously dehisces, or is deliberately opened or aspirated by a nonblinded investigators, and/or</li> </ul>                                                                                                                                                                                                                                                                                                                                                    |

1  
2  
3  
4  
5 c. an abscess or other evidence of infection is present and involves the deep incision.

6 In addition, the organism is identified by a culture or non-culture based microbiologic  
7 testing method that is performed for purposes of clinical diagnosis or treatment, and  
8 symptoms for infection must be applicable: fever, localized pain, or tenderness. Negative  
9 finding of a culture does not meet this criterion.  
10  
11

---

12  
13 Organ/space SSI

14 Organ/space SSI involves any part of the body other than the skin incision, fascia, or  
15 muscle layer that has been opened or manipulated during surgery. The specific site is  
16 classified as organ/space for the purpose of further identification of the infection site.  
17 Organ/space SSI must meet the following three criteria (A, B, and C).

18 A) Infection occurred within 30 days postoperatively.

19 B) The infection involves any part of the body that is opened or manipulated during the  
20 operative procedure (except for the facial/muscle layers).

21 C) At least one of the following is applicable:

22 a. purulent drainage is observed from a drain that is placed into the organ/space,

23 b. organisms are identified from fluid or tissue in the organ/space by a culture or non-  
24 culture based microbiologic testing method, and/or

25 c. an abscess or other evidence of infection is present and involves the organ/space.  
26  
27  
28  
29  
30

---

31  
32 \*Erythema; the skin redness of the skin that spreads away from the incision site, localized swelling; a bulge limited to the incision site,  
33  
34  
35 tenderness; pressured pain beyond normal for the operation.  
36  
37  
38  
39  
40  
41  
42  
43  
44  
45  
46

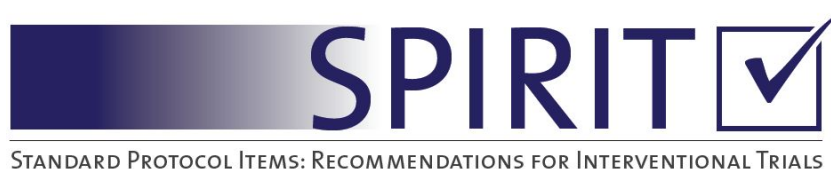

STANDARD PROTOCOL ITEMS: RECOMMENDATIONS FOR INTERVENTIONAL TRIALS

SPIRIT 2013 Checklist: Recommended items to address in a clinical trial protocol and related documents\*

| Section/item                      | ItemN<br>o<br>(Page<br>No) | Description                                                                                                                                                                                                                                                                              |
|-----------------------------------|----------------------------|------------------------------------------------------------------------------------------------------------------------------------------------------------------------------------------------------------------------------------------------------------------------------------------|
| <b>Administrative information</b> |                            |                                                                                                                                                                                                                                                                                          |
| Title                             | 1(p1)                      | Descriptive title identifying the study design, population, interventions, and, if applicable, trial acronym                                                                                                                                                                             |
| Trial registration                | 2a<br>(p4)                 | Trial identifier and registry name. If not yet registered, name of intended registry                                                                                                                                                                                                     |
|                                   | 2b<br>(n/a)                | All items from the World Health Organization Trial Registration Data Set                                                                                                                                                                                                                 |
|                                   | 3 (p12)                    | Date and version identifier                                                                                                                                                                                                                                                              |
| Funding                           | 4 (p24)                    | Sources and types of financial, material, and other support                                                                                                                                                                                                                              |
| Roles and responsibilities        | 5a<br>(p24)                | Names, affiliations, and roles of protocol contributors                                                                                                                                                                                                                                  |
|                                   | 5b<br>(p2)                 | Name and contact information for the trial sponsor                                                                                                                                                                                                                                       |
|                                   | 5c<br>(n/a)                | Role of study sponsor and funders, if any, in study design; collection, management, analysis, and interpretation of data; writing of the report; and the decision to submit the report for publication, including whether they will have ultimate authority over any of these activities |
|                                   | 5d<br>(n/a)                | Composition, roles, and responsibilities of the coordinating centre, steering committee, endpoint adjudication committee, data management team, and other individuals or groups overseeing the trial, if applicable (see Item 21a for data monitoring committee)                         |
| <b>Introduction</b>               |                            |                                                                                                                                                                                                                                                                                          |
| Background and rationale          | 6a<br>(p6-8)               | Description of research question and justification for undertaking the trial, including summary of relevant studies (published and unpublished) examining benefits and harms for each intervention                                                                                       |
|                                   | 6b<br>(p6-8)               | Explanation for choice of comparators                                                                                                                                                                                                                                                    |

|    |                                                                     |        |                                                                           |
|----|---------------------------------------------------------------------|--------|---------------------------------------------------------------------------|
| 1  |                                                                     |        |                                                                           |
| 2  | Objectives                                                          | 7      | Specific objectives or hypotheses                                         |
| 3  |                                                                     | (p6-8) |                                                                           |
| 4  |                                                                     |        |                                                                           |
| 5  | Trial design                                                        | 8      | Description of trial design including type of trial (eg, parallel group,  |
| 6  |                                                                     | (p6-8) | crossover, factorial, single group), allocation ratio, and framework      |
| 7  |                                                                     |        | (eg, superiority, equivalence, noninferiority, exploratory)               |
| 8  |                                                                     |        |                                                                           |
| 9  |                                                                     |        |                                                                           |
| 10 |                                                                     |        |                                                                           |
| 11 | <b>Methods: Participants, interventions, and outcomes</b>           |        |                                                                           |
| 12 |                                                                     |        |                                                                           |
| 13 | Study setting                                                       | 9      | Description of study settings (eg, community clinic, academic             |
| 14 |                                                                     | (p12)  | hospital) and list of countries where data will be collected.             |
| 15 |                                                                     |        | Reference to where list of study sites can be obtained                    |
| 16 |                                                                     |        |                                                                           |
| 17 | Eligibility criteria                                                | 10     | Inclusion and exclusion criteria for participants. If applicable,         |
| 18 |                                                                     | (p9)   | eligibility criteria for study centres and individuals who will perform   |
| 19 |                                                                     |        | the interventions (eg, surgeons, psychotherapists)                        |
| 20 |                                                                     |        |                                                                           |
| 21 |                                                                     |        |                                                                           |
| 22 | Interventions                                                       | 11a    | Interventions for each group with sufficient detail to allow replication, |
| 23 |                                                                     | (p10)  | including how and when they will be administered                          |
| 24 |                                                                     |        |                                                                           |
| 25 |                                                                     | 11b    | Criteria for discontinuing or modifying allocated interventions for a     |
| 26 |                                                                     | (p10)  | given trial participant (eg, drug dose change in response to harms,       |
| 27 |                                                                     |        | participant request, or improving/worsening disease)                      |
| 28 |                                                                     |        |                                                                           |
| 29 |                                                                     | 11c    | Strategies to improve adherence to intervention protocols, and any        |
| 30 |                                                                     | (n/a)  | procedures for monitoring adherence (eg, drug tablet return,              |
| 31 |                                                                     |        | laboratory tests)                                                         |
| 32 |                                                                     |        |                                                                           |
| 33 |                                                                     |        |                                                                           |
| 34 |                                                                     | 11d    | Relevant concomitant care and interventions that are permitted or         |
| 35 |                                                                     | (p10)  | prohibited during the trial                                               |
| 36 |                                                                     |        |                                                                           |
| 37 | Outcomes                                                            | 12     | Primary, secondary, and other outcomes, including the specific            |
| 38 |                                                                     | (p14)  | measurement variable (eg, systolic blood pressure), analysis metric       |
| 39 |                                                                     |        | (eg, change from baseline, final value, time to event), method of         |
| 40 |                                                                     |        | aggregation (eg, median, proportion), and time point for each             |
| 41 |                                                                     |        | outcome. Explanation of the clinical relevance of chosen efficacy         |
| 42 |                                                                     |        | and harm outcomes is strongly recommended                                 |
| 43 |                                                                     |        |                                                                           |
| 44 |                                                                     |        |                                                                           |
| 45 | Participant                                                         | 13     | Time schedule of enrolment, interventions (including any run-ins and      |
| 46 | timeline                                                            | (p14)  | washouts), assessments, and visits for participants. A schematic          |
| 47 |                                                                     |        | diagram is highly recommended (see Figure)                                |
| 48 |                                                                     |        |                                                                           |
| 49 |                                                                     |        |                                                                           |
| 50 | Sample size                                                         | 14     | Estimated number of participants needed to achieve study                  |
| 51 |                                                                     | (p17)  | objectives and how it was determined, including clinical and              |
| 52 |                                                                     |        | statistical assumptions supporting any sample size calculations           |
| 53 |                                                                     |        |                                                                           |
| 54 | Recruitment                                                         | 15     | Strategies for achieving adequate participant enrolment to reach          |
| 55 |                                                                     | (p12)  | target sample size                                                        |
| 56 |                                                                     |        |                                                                           |
| 57 |                                                                     |        |                                                                           |
| 58 | <b>Methods: Assignment of interventions (for controlled trials)</b> |        |                                                                           |
| 59 |                                                                     |        |                                                                           |
| 60 | Allocation:                                                         |        |                                                                           |

|    |                |       |                                                                        |
|----|----------------|-------|------------------------------------------------------------------------|
| 1  |                |       |                                                                        |
| 2  | Sequence       | 16a   | Method of generating the allocation sequence (eg, computer-            |
| 3  | generation     | (p12) | generated random numbers), and list of any factors for stratification. |
| 4  |                |       | To reduce predictability of a random sequence, details of any          |
| 5  |                |       | planned restriction (eg, blocking) should be provided in a separate    |
| 6  |                |       | document that is unavailable to those who enrol participants or        |
| 7  |                |       | assign interventions                                                   |
| 8  |                |       |                                                                        |
| 9  |                |       |                                                                        |
| 10 | Allocation     | 16b   | Mechanism of implementing the allocation sequence (eg, central         |
| 11 | concealment    | (p14) | telephone; sequentially numbered, opaque, sealed envelopes),           |
| 12 | mechanism      |       | describing any steps to conceal the sequence until interventions are   |
| 13 |                |       | assigned                                                               |
| 14 |                |       |                                                                        |
| 15 | Implementation | 16c   | Who will generate the allocation sequence, who will enrol              |
| 16 |                | (p12) | participants, and who will assign participants to interventions        |
| 17 |                |       |                                                                        |
| 18 | Blinding       | 17a   | Who will be blinded after assignment to interventions (eg, trial       |
| 19 | (masking)      | (p13) | participants, care providers, outcome assessors, data analysts), and   |
| 20 |                |       | how                                                                    |
| 21 |                |       |                                                                        |
| 22 |                |       |                                                                        |
| 23 |                | 17b   | If blinded, circumstances under which unblinding is permissible, and   |
| 24 |                | (n/a) | procedure for revealing a participant's allocated intervention during  |
| 25 |                |       | the trial                                                              |
| 26 |                |       |                                                                        |
| 27 |                |       |                                                                        |

### Methods: Data collection, management, and analysis

|    |                 |       |                                                                          |
|----|-----------------|-------|--------------------------------------------------------------------------|
| 28 |                 |       |                                                                          |
| 29 |                 |       |                                                                          |
| 30 | Data collection | 18a   | Plans for assessment and collection of outcome, baseline, and other      |
| 31 | methods         | (p16) | trial data, including any related processes to promote data quality      |
| 32 |                 |       | (eg, duplicate measurements, training of assessors) and a                |
| 33 |                 |       | description of study instruments (eg, questionnaires, laboratory         |
| 34 |                 |       | tests) along with their reliability and validity, if known. Reference to |
| 35 |                 |       | where data collection forms can be found, if not in the protocol         |
| 36 |                 |       |                                                                          |
| 37 |                 |       |                                                                          |
| 38 |                 | 18b   | Plans to promote participant retention and complete follow-up,           |
| 39 |                 | (p16) | including list of any outcome data to be collected for participants      |
| 40 |                 |       | who discontinue or deviate from intervention protocols                   |
| 41 |                 |       |                                                                          |
| 42 | Data            | 19    | Plans for data entry, coding, security, and storage, including any       |
| 43 | management      | (p16) | related processes to promote data quality (eg, double data entry;        |
| 44 |                 |       | range checks for data values). Reference to where details of data        |
| 45 |                 |       | management procedures can be found, if not in the protocol               |
| 46 |                 |       |                                                                          |
| 47 |                 |       |                                                                          |
| 48 | Statistical     | 20a   | Statistical methods for analysing primary and secondary outcomes.        |
| 49 | methods         | (p17) | Reference to where other details of the statistical analysis plan can    |
| 50 |                 |       | be found, if not in the protocol                                         |
| 51 |                 |       |                                                                          |
| 52 |                 |       |                                                                          |
| 53 |                 | 20b   | Methods for any additional analyses (eg, subgroup and adjusted           |
| 54 |                 | (p17) | analyses)                                                                |
| 55 |                 |       |                                                                          |
| 56 |                 | 20c   | Definition of analysis population relating to protocol non-adherence     |
| 57 |                 | (p17) | (eg, as randomised analysis), and any statistical methods to handle      |
| 58 |                 |       | missing data (eg, multiple imputation)                                   |
| 59 |                 |       |                                                                          |
| 60 |                 |       |                                                                          |

## Methods: Monitoring

|                 |              |                                                                                                                                                                                                                                                                                                                                       |
|-----------------|--------------|---------------------------------------------------------------------------------------------------------------------------------------------------------------------------------------------------------------------------------------------------------------------------------------------------------------------------------------|
| Data monitoring | 21a<br>(p16) | Composition of data monitoring committee (DMC); summary of its role and reporting structure; statement of whether it is independent from the sponsor and competing interests; and reference to where further details about its charter can be found, if not in the protocol. Alternatively, an explanation of why a DMC is not needed |
|                 | 21b<br>(p16) | Description of any interim analyses and stopping guidelines, including who will have access to these interim results and make the final decision to terminate the trial                                                                                                                                                               |
| Harms           | 22<br>(n/a)  | Plans for collecting, assessing, reporting, and managing solicited and spontaneously reported adverse events and other unintended effects of trial interventions or trial conduct                                                                                                                                                     |
| Auditing        | 23<br>(n/a)  | Frequency and procedures for auditing trial conduct, if any, and whether the process will be independent from investigators and the sponsor                                                                                                                                                                                           |

## Ethics and dissemination

|                               |              |                                                                                                                                                                                                                                  |
|-------------------------------|--------------|----------------------------------------------------------------------------------------------------------------------------------------------------------------------------------------------------------------------------------|
| Research ethics approval      | 24<br>(p19)  | Plans for seeking research ethics committee/institutional review board (REC/IRB) approval                                                                                                                                        |
| Protocol amendments           | 25<br>(n/a)  | Plans for communicating important protocol modifications (eg, changes to eligibility criteria, outcomes, analyses) to relevant parties (eg, investigators, REC/IRBs, trial participants, trial registries, journals, regulators) |
| Consent or assent             | 26a<br>(p12) | Who will obtain informed consent or assent from potential trial participants or authorised surrogates, and how (see Item 32)                                                                                                     |
|                               | 26b<br>(n/a) | Additional consent provisions for collection and use of participant data and biological specimens in ancillary studies, if applicable                                                                                            |
| Confidentiality               | 27<br>(p15)  | How personal information about potential and enrolled participants will be collected, shared, and maintained in order to protect confidentiality before, during, and after the trial                                             |
| Declaration of interests      | 28<br>(p24)  | Financial and other competing interests for principal investigators for the overall trial and each study site                                                                                                                    |
| Access to data                | 29<br>(n/a)  | Statement of who will have access to the final trial dataset, and disclosure of contractual agreements that limit such access for investigators                                                                                  |
| Ancillary and post-trial care | 30<br>(n/a)  | Provisions, if any, for ancillary and post-trial care, and for compensation to those who suffer harm from trial participation                                                                                                    |

|    |               |       |                                                                        |
|----|---------------|-------|------------------------------------------------------------------------|
| 1  |               |       |                                                                        |
| 2  | Dissemination | 31a   | Plans for investigators and sponsor to communicate trial results to    |
| 3  | policy        | (n/a) | participants, healthcare professionals, the public, and other relevant |
| 4  |               |       | groups (eg, via publication, reporting in results databases, or other  |
| 5  |               |       | data sharing arrangements), including any publication restrictions     |
| 6  |               |       |                                                                        |
| 7  |               | 31b   | Authorship eligibility guidelines and any intended use of professional |
| 8  |               | (p24) | writers                                                                |
| 9  |               |       |                                                                        |
| 10 |               | 31c   | Plans, if any, for granting public access to the full protocol,        |
| 11 |               | (n/a) | participant-level dataset, and statistical code                        |
| 12 |               |       |                                                                        |
| 13 |               |       |                                                                        |

## Appendices

|    |                  |       |                                                                        |
|----|------------------|-------|------------------------------------------------------------------------|
| 14 |                  |       |                                                                        |
| 15 |                  |       |                                                                        |
| 16 | Informed consent | 32    | Model consent form and other related documentation given to            |
| 17 | materials        | (n/a) | participants and authorised surrogates                                 |
| 18 |                  |       |                                                                        |
| 19 | Biological       | 33    | Plans for collection, laboratory evaluation, and storage of biological |
| 20 | specimens        | (n/a) | specimens for genetic or molecular analysis in the current trial and   |
| 21 |                  |       | for future use in ancillary studies, if applicable                     |
| 22 |                  |       |                                                                        |

---

\*It is strongly recommended that this checklist be read in conjunction with the SPIRIT 2013 Explanation & Elaboration for important clarification on the items. Amendments to the protocol should be tracked and dated. The SPIRIT checklist is copyrighted by the SPIRIT Group under the Creative Commons "[Attribution-NonCommercial-NoDerivs 3.0 Unported](https://creativecommons.org/licenses/by-nc-nd/3.0/)" license.

# BMJ Open

## Comparison of olanexidine versus povidone-iodine for preventing surgical site infection in gastrointestinal surgery: study protocol for a multicenter, single-blind, randomized controlled clinical trial

|                               |                                                                                                                                                                                                                                                                                                                                                                                                                                                                                                                                                                                                                                                                                                                                                                                                                                                                                                                                                                                                                                                                                                                                                                                                                                                                                                                                                                                                                                                                                                                                                                                                                                                                                                                                                                                                                                                                                                                                                                                                                                                                                                                              |
|-------------------------------|------------------------------------------------------------------------------------------------------------------------------------------------------------------------------------------------------------------------------------------------------------------------------------------------------------------------------------------------------------------------------------------------------------------------------------------------------------------------------------------------------------------------------------------------------------------------------------------------------------------------------------------------------------------------------------------------------------------------------------------------------------------------------------------------------------------------------------------------------------------------------------------------------------------------------------------------------------------------------------------------------------------------------------------------------------------------------------------------------------------------------------------------------------------------------------------------------------------------------------------------------------------------------------------------------------------------------------------------------------------------------------------------------------------------------------------------------------------------------------------------------------------------------------------------------------------------------------------------------------------------------------------------------------------------------------------------------------------------------------------------------------------------------------------------------------------------------------------------------------------------------------------------------------------------------------------------------------------------------------------------------------------------------------------------------------------------------------------------------------------------------|
| Journal:                      | <i>BMJ Open</i>                                                                                                                                                                                                                                                                                                                                                                                                                                                                                                                                                                                                                                                                                                                                                                                                                                                                                                                                                                                                                                                                                                                                                                                                                                                                                                                                                                                                                                                                                                                                                                                                                                                                                                                                                                                                                                                                                                                                                                                                                                                                                                              |
| Manuscript ID                 | bmjopen-2018-028269.R2                                                                                                                                                                                                                                                                                                                                                                                                                                                                                                                                                                                                                                                                                                                                                                                                                                                                                                                                                                                                                                                                                                                                                                                                                                                                                                                                                                                                                                                                                                                                                                                                                                                                                                                                                                                                                                                                                                                                                                                                                                                                                                       |
| Article Type:                 | Protocol                                                                                                                                                                                                                                                                                                                                                                                                                                                                                                                                                                                                                                                                                                                                                                                                                                                                                                                                                                                                                                                                                                                                                                                                                                                                                                                                                                                                                                                                                                                                                                                                                                                                                                                                                                                                                                                                                                                                                                                                                                                                                                                     |
| Date Submitted by the Author: | 14-Mar-2019                                                                                                                                                                                                                                                                                                                                                                                                                                                                                                                                                                                                                                                                                                                                                                                                                                                                                                                                                                                                                                                                                                                                                                                                                                                                                                                                                                                                                                                                                                                                                                                                                                                                                                                                                                                                                                                                                                                                                                                                                                                                                                                  |
| Complete List of Authors:     | <p>Takeuchi, Masashi; Keio University School of Medicine Graduate School of Medicine Department of Surgery<br/> Obara, Hideaki; Keio University School of Medicine Graduate School of Medicine Department of Surgery,<br/> Kawakubo, Hirofumi ; Keio University School of Medicine Graduate School of Medicine Department of Surgery<br/> Shinoda, Masahiro ; Keio University School of Medicine Graduate School of Medicine Department of Surgery<br/> Okabayashi, Koji ; Keio University School of Medicine Graduate School of Medicine Department of Surgery<br/> Mayanagi, Shuhei ; Keio University School of Medicine Graduate School of Medicine Department of Surgery<br/> Irinno, Tomoyuki; Keio University School of Medicine Graduate School of Medicine Department of Surgery<br/> Fukuda, Kazumasa; Keio University School of Medicine Graduate School of Medicine Department of Surgery<br/> Nakamura, Rieko; Keio University School of Medicine Graduate School of Medicine Department of Surgery<br/> Wada, Norihito ; Keio University School of Medicine Graduate School of Medicine Department of Surgery<br/> Kitago, Minoru ; Keio University School of Medicine Graduate School of Medicine Department of Surgery<br/> Yagi, Hiroshi ; Keio University School of Medicine Graduate School of Medicine Department of Surgery<br/> Abe, Yuta; Keio University School of Medicine Graduate School of Medicine Department of Surgery<br/> Oshima, Go ; Keio University School of Medicine Graduate School of Medicine Department of Surgery<br/> Hori, Shutaro ; Keio University School of Medicine Graduate School of Medicine Department of Surgery<br/> Tsuruta, Masashi ; Keio University School of Medicine Graduate School of Medicine Department of Surgery<br/> Ishida, Takashi ; Keio University School of Medicine Graduate School of Medicine Department of Surgery<br/> Yokose, Takahiro ; Keio University School of Medicine Graduate School of Medicine Department of Surgery<br/> Hirukawa, Kazuya ; Keio University School of Medicine Graduate School of Medicine Department of Surgery</p> |



|                                 |                                                                                                                                                                                                                                                                                                                                                                                                                                                                                                                                                                                                                                                                                                                       |
|---------------------------------|-----------------------------------------------------------------------------------------------------------------------------------------------------------------------------------------------------------------------------------------------------------------------------------------------------------------------------------------------------------------------------------------------------------------------------------------------------------------------------------------------------------------------------------------------------------------------------------------------------------------------------------------------------------------------------------------------------------------------|
|                                 | Isobe, Yoh; Department of surgery, National Hospital Organization Tokyo Medical Center<br>Sekimoto, Yasuhito ; Department of surgery, National Hospital Organization Tokyo Medical Center<br>Harada, Hirohisa ; Department of Surgery, Tokyo Saiseikai Central Hospital<br>Maeda, Yusuke ; Department of Surgery, Tokyo Saiseikai Central Hospital<br>Shito, Masaya ; Department of Surgery, Kawasaki Municipal Hospital<br>Kondo, Takayuki ; Department of Surgery, Kawasaki Municipal Hospital<br>Sato, Yasunori ; Department of Preventive Medicine and Public Health, Keio University School of Medicine<br>Kitagawa, Yuko ; Keio University School of Medicine Graduate School of Medicine Department of Surgery |
| <b>Primary Subject Heading</b>: | Surgery                                                                                                                                                                                                                                                                                                                                                                                                                                                                                                                                                                                                                                                                                                               |
| Secondary Subject Heading:      | Gastroenterology and hepatology                                                                                                                                                                                                                                                                                                                                                                                                                                                                                                                                                                                                                                                                                       |
| Keywords:                       | WOUND MANAGEMENT, SURGERY, Gastrointestinal infections < GASTROENTEROLOGY                                                                                                                                                                                                                                                                                                                                                                                                                                                                                                                                                                                                                                             |
|                                 |                                                                                                                                                                                                                                                                                                                                                                                                                                                                                                                                                                                                                                                                                                                       |

SCHOLARONE™  
Manuscripts

1  
2  
3  
4 **1 Comparison of olanexidine versus povidone-iodine for preventing surgical site infection**  
5  
6  
7 **2 in gastrointestinal surgery: study protocol for a multicenter, single-blind, randomized**  
8  
9  
10 **3 controlled clinical trial**

11  
12  
13  
14 4 Masashi Takeuchi, M.D.<sup>1</sup>; Hideaki Obara, M.D., Ph.D.<sup>1</sup>; Hirofumi Kawakubo, M.D., Ph.D.<sup>1</sup>;  
15  
16  
17 5 Masahiro Shinoda, M.D., Ph.D.<sup>1</sup>; Koji Okabayashi, M.D., Ph.D.<sup>1</sup>; Shuhei Mayanagi, M.D.,  
18  
19  
20 6 Ph.D.<sup>1</sup>; Tomoyuki Irino, M.D., Ph.D.<sup>1</sup>; Kazumasa Fukuda, Ph.D.<sup>1</sup>; Rieko Nakamura, M.D.,  
21  
22  
23 7 Ph.D.<sup>1</sup>; Norihito Wada, M.D., Ph.D.<sup>1</sup>; Minoru Kitago, M.D., Ph.D.<sup>1</sup>; Hiroshi Yagi, M.D.,  
24  
25  
26 8 Ph.D.<sup>1</sup>; Yuta Abe, M.D., Ph.D.<sup>1</sup>; Go Oshima, M.D., Ph.D.<sup>1</sup>; Shutaro Hori, M.D., Ph.D.<sup>1</sup>;  
27  
28  
29 9 Masashi Tsuruta, M.D., Ph.D.<sup>1</sup>; Takashi Ishida, M.D., Ph.D.<sup>1</sup>; Takahiro Yokose, M.D.<sup>1</sup>;  
30  
31  
32 10 Kazuya Hirukawa, M.D.<sup>1</sup>; Yoh Isobe, M.D., Ph.D.<sup>2</sup>; Yasuhito Sekimoto, M.D.<sup>2</sup>; Hirohisa  
33  
34  
35 11 Harada, M.D., Ph.D.<sup>3</sup>; Yusuke Maeda, M.D.<sup>3</sup>; Masaya Shito, M.D., Ph.D.<sup>4</sup>; Takayuki Kondo,  
36  
37  
38 12 M.D.<sup>4</sup>; Yasunori Sato, Ph.D.<sup>5</sup>; and Yuko Kitagawa, M.D., Ph.D.<sup>1</sup>

39  
40  
41 13 <sup>1</sup>Department of Surgery, Keio University School of Medicine, 35 Shinanomachi,  
42  
43  
44 14 Shinjuku-ku, Tokyo 160-8582, Japan

45  
46  
47 15 <sup>2</sup>Department of Surgery, National Hospital Organization Tokyo Medical Center, 2-5-1  
48  
49  
50 16 Higashigaoka, Meguro-ku, Tokyo 152-8902, Japan

51  
52  
53 17 <sup>3</sup>Department of Surgery, Tokyo Saiseikai Central Hospital, 1-4-17 Mita, Minato-ku, Tokyo

1  
2  
3  
4 1 108-0073, Japan  
5  
6

7  
8 2 <sup>4</sup>Department of Surgery, Kawasaki Municipal Hospital, 12-1 Shinkawadori, Kawasaki-ku,  
9

10  
11 3 Kawasaki-shi, Kanagawa 210-0013, Japan  
12  
13

14 4 <sup>5</sup>Department of Preventive Medicine and Public Health, Keio University School of Medicine,  
15

16  
17 5 35 Shinanomachi, Shinjuku-ku, Tokyo 160-8582, Japan  
18  
19

20  
21 6 **Corresponding author:** Hideaki Obara, M.D., Ph.D.  
22

23  
24 7 Department of Surgery, Keio University School of Medicine, 35 Shinanomachi, Shinjuku-ku,  
25

26  
27 8 Tokyo 160-8582, Japan  
28  
29

30  
31 9 E-mail: obara.z3@keio.jp  
32  
33

34 10 Tel: +81-3-3353-1211; Fax: +81-3-3755-4707  
35  
36

37 11 **Word count:** 2791  
38  
39  
40  
41  
42  
43  
44  
45  
46  
47  
48  
49  
50  
51  
52  
53  
54  
55  
56  
57  
58  
59  
60

1

2 **ABSTRACT**

3 **Introduction:** The prevalence of surgical site infection (SSI) remains higher in  
4 gastrointestinal surgery than in other surgeries. Although several guidelines have indicated  
5 the efficacy of chlorhexidine and povidone-iodine in reducing the SSI rate, the optimal  
6 recommendation has still not been established. Therefore, it is necessary to determine the  
7 more effective antiseptic for surgical site preparation. Olanexidine (1.5% Olanedine<sup>®</sup>, Otsuka  
8 Pharmaceutical Factory, Inc., Tokushima, Japan), which is a new antiseptic in Japan, has  
9 antimicrobial activity against a wide range of bacteria, including gram-positive and  
10 gram-negative bacteria. Our study will contribute to determining a new antiseptic for use in  
11 gastrointestinal and other surgeries.

12 **Methods and analysis:** We propose a multicenter, randomized controlled clinical trial for  
13 comparing two treatments, i.e., 1.5% olanexidine or 10% povidone-iodine, for surgical skin  
14 preparation to prevent SSI in clean-contaminated gastrointestinal surgeries with surgical  
15 wounds. Patients aged  $\geq 20$  years at the time of consent will be included. The primary  
16 outcome measure is the 30-day postoperative SSI rate. For the primary analysis, which is

1  
2  
3  
4 1 aimed at comparing the treatment effects, the adjusted risk ratio and its 95% confidence  
5  
6  
7  
8 2 interval will be estimated using the Mantel-Haenszel method.  
9

10  
11 3 **Ethics and dissemination:** The protocol was first approved by the Institutional Review  
12  
13  
14 4 Board of Keio University School of Medicine, followed by the institutional review board of  
15  
16  
17  
18 5 each participating site. Participant recruitment began in June 2018. The final results will be  
19  
20  
21 6 published in international peer-reviewed medical journals.  
22

23  
24 7 **Trial registration number:** UMIN 000031560  
25  
26  
27  
28 8 ([https://upload.umin.ac.jp/cgi-open-bin/ctr\\_e/ctr\\_view.cgi?recptno=R000036031](https://upload.umin.ac.jp/cgi-open-bin/ctr_e/ctr_view.cgi?recptno=R000036031))  
29  
30  
31  
32  
33  
34  
35  
36  
37  
38  
39  
40  
41  
42  
43  
44  
45  
46  
47  
48  
49  
50  
51  
52  
53  
54  
55  
56  
57  
58  
59  
60

1

## 2 **Article Summary**

### 3 **Strengths and limitations of this study**

4 • This is the first study to evaluate the effect of olanexidine, which has been  
5 commercially available in Japan since 2015.

6 • The study design is a multicenter, single-blind, randomized controlled clinical trial.

7 • The primary outcome measure is the 30-day postoperative SSI rate.

8 • This study is limited to a Japanese population, which could introduce an element of  
9 selection bias, because olanexidine is only commercially available in Japan.

1  
2  
3  
4 15  
6  
7 2 **INTRODUCTION**

8  
9  
10 3 Surgical site infection (SSI) is one of the most common nosocomial infections in surgical  
11  
12  
13  
14 4 patients.<sup>1</sup> The rate of SSI in gastrointestinal surgery in particular is higher than in other  
15  
16  
17 5 surgeries, such as cardiothoracic surgery, gynecologic surgery, and neurosurgery,<sup>2-4</sup> and it has  
18  
19  
20 6 been reported that 10% to 30% of patients suffer from SSI after gastrointestinal surgery.<sup>5</sup> SSI  
21  
22  
23  
24 7 not only causes prolonged hospitalization and delay of postoperative therapy, but increased  
25  
26  
27 8 medical costs of \$1300-5000 per person for inpatient treatment, including antibiotic  
28  
29  
30 9 therapy.<sup>6,7</sup> Therefore, prevention of SSI is extremely important for both the patient and all  
31  
32  
33  
34 10 medical practitioners involved in the surgery.

35  
36  
37 11 Many perioperative measures for decreasing SSI have been reported, including enhanced  
38  
39  
40 12 nutritional support, perioperative oxygenation, surgical technique, wound dressing, and use  
41  
42  
43  
44 13 of an antimicrobial agent.<sup>1,8</sup> Surgical site preparation is useful for preventing SSI because it  
45  
46  
47 14 can remove microorganisms from the skin. Thus far, two types of preparations,  
48  
49  
50  
51 15 povidone-iodine and chlorhexidine-alcohol,<sup>9-12</sup> have been commonly used as preoperative  
52  
53  
54 16 antiseptic procedures worldwide. The Centers for Disease Control and Prevention (CDC)  
55  
56  
57 17 guideline only recommends skin preparation with an alcohol-containing agent if there are no  
58  
59  
60

1  
2  
3  
4 1 contraindications to its use, and other guidelines do not favor one antiseptic agent over  
5  
6  
7  
8 2 another for skin preparation.<sup>1,13,14</sup> Both preparations have broad-spectrum antibacterial  
9  
10  
11 3 effectiveness; however, povidone-iodine's activity is known to decrease in the presence of  
12  
13  
14 4 organic materials including blood or pus.<sup>15</sup> In contrast, chlorhexidine-alcohol has high  
15  
16  
17 5 antibacterial activity against some pathogens, such as methicillin-resistant *Staphylococcus*  
18  
19  
20 6 *aureus* (MRSA)<sup>15</sup> and vancomycin-resistant enterococci (VRE); nevertheless, it is associated  
21  
22  
23  
24 7 with inflammability, is more expensive than povidone-iodine, and has been linked to allergic  
25  
26  
27 8 reactions.<sup>16,17</sup> Therefore, it is necessary to determine the more effective antiseptic for surgical  
28  
29  
30  
31 9 site preparation.  
32  
33

34 10 Olanexidine (1.5% Olanedine®; Otsuka Pharmaceutical Factory, Inc., Tokushima, Japan),  
35  
36  
37 11 which is a new antiseptic, is one of the biguanide bactericidal disinfectants that contains  
38  
39  
40  
41 12 olanexidine gluconate as its active ingredient.<sup>18,19</sup> It has been commercially available in Japan  
42  
43  
44 13 since 2015. It can disrupt membrane integrity by binding to the cell membrane resulting in  
45  
46  
47 14 irreversible leakage of intracellular components, which is the mechanism underlying its  
48  
49  
50  
51 15 bactericidal and fungicidal activities.<sup>18</sup> Olanexidine has antimicrobial activity against a wide  
52  
53  
54 16 range of bacteria, including gram-positive and gram-negative bacteria. Moreover, Inoue et al.  
55  
56  
57 17 reported that compared to chlorhexidine-alcohol and povidone-iodine, olanexidine showed  
58  
59  
60



1 more potent bactericidal activity against MRSA and VRE both in vitro and in vivo.<sup>18</sup>

2 Therefore, the use of olanexidine is highly expected to lead to decreases in the SSI rate.

3 However, to date, no study has evaluated the effectiveness and safety of olanexidine

4 compared to conventional antiseptics in large-scale clinical trials.

5 In this multicenter, randomized controlled clinical trial, we aim to evaluate whether

6 olanexidine or povidone-iodine, which is the conventional skin antiseptic used in Japan, is

7 useful for preventing SSI in gastrointestinal surgery. We hypothesize that olanexidine will be

8 more useful for preventing SSI than povidone-iodine without increasing toxicity.

1

## 2 **METHODS**

### 3 **Trial design**

4 This is a multi-center, prospective, randomized, blinded-endpoint trial (PROBE) designed  
5 to assess the efficacy of 1.5% olanexidine for surgical skin preparation for preventing SSIs in  
6 gastrointestinal surgery. The trial was designed and will be independently conducted by Keio  
7 University with approval from the ethics committee of Keio University School of Medicine  
8 in accordance with the principals of the Declaration of Helsinki. All analyses will be  
9 conducted by Keio University, independent of the sponsor, according to the prespecified  
10 statistical analysis plan (SAP). As a prospective randomized controlled trial, the study  
11 strategy will be constructed and presented in accordance with the recommendations of the  
12 SPIRIT statement.

13

### 14 **Eligibility criteria**

15 Eligible patients are those who meet all of the following inclusion criteria and who do not  
16 have any listed exclusion criteria.

- 17 • Inclusion criteria

- 1
- 2
- 3
- 4 1) Scheduled to undergo elective gastrointestinal surgery involving the esophagus, stomach,
- 5
- 6
- 7
- 8 2) duodenum, small intestine, colorectal, liver, biliary tract, and pancreas that has a class II
- 9
- 10
- 11 3) surgical wound (Table 1).
- 12
- 13
- 14 2) Age  $\geq 20$  years at the time of consent by non-blinded investigators.
- 15
- 16
- 17 3) Provision of written informed consent by the patient.
- 18
- 19
- 20
- 21 • Exclusion criteria
- 22
- 23
- 24 1) Allergy to olanexidine gluconate or povidone-iodine.
- 25
- 26
- 27 2) Unable to undergo follow-up 30 days postoperatively.
- 28
- 29
- 30
- 31 3) Active bacterial infection at the time of informed consent (except for viral hepatitis).
- 32
- 33
- 34 4) Antimicrobial therapy on the day before surgery.
- 35
- 36
- 37 5) Undergoing non-elective surgery or surgery requiring antisepsis of the mucosal surfaces or
- 38
- 39
- 40
- 41 12) surgical wound sites.
- 42
- 43
- 44 6) Unsuitable conditions for safe conduct of this trial according to the non-blinded
- 45
- 46
- 47
- 48 investigators.
- 49
- 50
- 51
- 52
- 53
- 54
- 55
- 56
- 57
- 58
- 59
- 60

## 16 **Intervention**

17 Study arm A (experimental group): Surgical skin antisepsis with an aqueous formulation of

1 1.5% olanexidine is administered immediately before gastrointestinal surgery.

2 Study arm B (control group): Surgical skin antiseptics with an aqueous formulation of 10%

3 povidone-iodine is administered immediately before gastrointestinal surgery.

4

#### 5 **Treatment protocol**

6 The antiseptics should be applied widely in consideration of the drain site and length of the  
7 skin incision. We apply agents from the papilla (in cases of esophageal surgery; the neck)  
8 with a cranial limit and to the upper thigh with a caudal limit. The duration of application of  
9 both antiseptics is at least 1 minute. After waiting 3 minutes to allow the antiseptics to dry,  
10 the operation is started. Olanexidine is administered by ready-to-use applicators. One  
11 olanexidine applicator will be used in surgery; however, if surgeons determine that  
12 disinfection is inadequate, an additional applicator can be added. Povidone-iodine is  
13 administered by a brush or by compression using pliers.

14 We used other measures to prevent SSI in our protocol as follows:

15 (1) Administering standard antibiotic prophylaxis before making the surgical incision

16 (2) Using absorbable sutures for wound closure and recommending the use of  
17 antimicrobial-coated sutures

- 1
- 2
- 3
- 4 1 (3) Recommending the use of a wound protector [The types used are the Alexis® wound
- 5
- 6
- 7 2 protector (Medical Leaders Co. Ltd, Japan) or the lap protector (HAKKO Co. Ltd, Japan),
- 8
- 9
- 10 3 which are used without anti-infective agents]
- 11
- 12
- 13
- 14 4 (4) Recommending wound irrigation with sterile normal saline
- 15
- 16
- 17 5 (5) Not restricting the type of immunosuppressive agent that can be used
- 18
- 19
- 20 6 (6) Changing or maintaining the same gloves during the operation
- 21
- 22
- 23
- 24 7 (7) Changing or maintaining the surgical instruments
- 25
- 26

27 8 Furthermore, we always maintain a normal body temperature by using warming devices  
28  
29 9 during surgery, and do not perform preoperative hair removal.  
30  
31  
32  
33  
34 10

### 35 36 37 11 **Recruitment of study participants**

38  
39  
40 12 The trial protocol (October 24, 2018, version 1.3) was approved by each participating  
41  
42  
43 13 institution's institutional review board and registered in the University Hospital Medical  
44  
45  
46 14 Information Network Clinical Trials Registry (number UMIN 000031560). Recruitment into  
47  
48  
49  
50 15 the trial started in June 2018 and will continue until 600 participants are registered. All  
51  
52  
53 16 participants who meet the inclusion criteria will receive a participant information sheet from  
54  
55  
56  
57 17 investigators before giving written informed consent. This study is being conducted at 4  
58  
59  
60

1  
2  
3  
4 1 general centers: Keio University Hospital (Tokyo, Japan), National Hospital Organization  
5  
6  
7 2 Tokyo Medical Center (Tokyo, Japan), Tokyo Saiseikai Central Hospital (Tokyo, Japan), and  
8  
9  
10  
11 3 Kawasaki Municipal Hospital (Kanagawa, Japan).  
12  
13  
14  
15  
16  
17

## 18 5 **Randomization**

19  
20  
21 6 Registration and allocation of participants is performed by non-blinded investigators using  
22  
23  
24 7 the CapTool® Lite (Mebix Inc., Tokyo, Japan). Eligible patients will be randomized to either  
25  
26  
27 8 surgical skin antisepsis with olanexidine (study arm A) or surgical skin antisepsis with  
28  
29  
30 9 povidone-iodine (study arm B) in a 1:1 replacement ratio. The random sequence will be  
31  
32  
33  
34 10 generated from computer-generated block randomization. We designated the factor of  
35  
36  
37 11 surgical approach (laparoscopy versus laparotomy) as the allocation adjustment factor  
38  
39  
40 12 because of evidence that there is a significantly higher SSI rate in laparotomy than in  
41  
42  
43  
44 13 laparoscopy.<sup>20</sup>  
45  
46  
47  
48  
49  
50

## 51 15 **Blinding**

52  
53  
54 16 Both patients and investigators will be blinded to the assigned group. Although there is a  
55  
56  
57 17 difference in color between povidone-iodine and olanexidine, it is feasible for patients to be  
58  
59  
60

1 masked because we wipe the stain of the antiseptic off their skin postoperatively.

2 Non-blinded investigators cannot be masked because they will be in the operating room when  
3 the antiseptic is used.

4 Non-blinded investigators will answer the questionnaire about the wound condition; however,  
5 they do not diagnose the presence or absence of SSI. SSIs are diagnosed by investigators who  
6 are blinded to the group allocation with reference to the questionnaire. Blinded investigators  
7 perform data entry for diagnosis of SSI, and the data analyst is blinded.

## 9 **Trial visits**

10 Generally, patients are hospitalized 1 to 4 days before surgery. We obtain informed consent  
11 and record the patients' background characteristics after admission. Informed consent for the  
12 operation and clinical trial is routinely obtained on the day before surgery. Thus,  
13 randomization is mainly performed on the day before surgery. The duration of observation  
14 will be 30 days postoperatively. The schedule for the trial visits and data collection is  
15 summarized in Table 2.

## 17 **Outcome measures**

1.

1 The non-blinded investigators will observe the surgical wound site daily during admission.  
2  
3  
4  
5  
6  
7  
8 2 After discharge, participants will undergo outpatient observation at least once if it is within  
9  
10  
11 3 30 days postoperatively. Non-blinded investigators will observe the surgical wound in the  
12  
13  
14 4 same manner as during the hospital stay. We also recommend that patients visit the outpatient  
15  
16  
17 5 clinic or an emergency department if there are any symptoms suggestive of SSI such as pain  
18  
19  
20  
21 6 or redness. If SSI is suspected based on the clinical findings, a microbiological culture would  
22  
23  
24 7 be collected using a cotton swab. The diagnosis of SSI will be determined by blinded  
25  
26  
27 8 investigators who will be unaware of the patients' group assignment. The investigator will  
28  
29  
30  
31 9 verify the SSI via chart review by using the questionnaire for SSI provided by the  
32  
33  
34 10 non-blinded investigators in accordance with the CDC guideline. Moreover, blinded  
35  
36  
37 11 investigators will assess the seriousness of all adverse events and determine whether they are  
38  
39  
40  
41 12 related to the study.

44 13 (1) Primary outcome measure

47 14 Postoperative 30-day SSI rate

50 15 (2) Secondary outcome measures

53 16 Postoperative 30-day superficial incisional SSI rate, deep incisional SSI rate, organ/space SSI  
54  
55  
56  
57 17 rate, positive bacterial wound culture rate, bacterial strains, and rates of intervention-related  
58  
59  
60



1 toxicity and allergic events (e.g., erythema, pruritus, dermatitis, and other symptoms of  
2 allergy around the region disinfected by the antiseptic during surgery).

3

#### 4 **Definitions**

5 SSIs are classified as superficial incisional, deep incisional, and organ/space based on  
6 criteria in the CDC guidelines (Supplemental Table 1).<sup>1</sup>

7

#### 8 **Data collection**

9 All data will be collected and recorded into the web-based electronic case report form (CRF;  
10 CapTool® Lite) by the trial or non-blinded investigators. From the electronic CRF, the trial  
11 database will be established. Patients' characteristics, such as sex, age, smoking status, body  
12 mass index, the use of prophylactic antibiotics, mode of skin closure, comorbidities, such as  
13 diabetes mellitus, and steroid use, will be collected.

14 Data will also be collected regarding the surgical procedures such as the type of surgery, use  
15 of laparoscopy, method of wound closure, type of prophylactic antiseptic agent, repeat  
16 application of an antiseptic agent, use of sterilized sutures for wound closure, amount of  
17 intraperitoneal irrigation, amounts of wound irrigation and blood loss, and status of excision

1 site, and recorded in the electric CRF. We will confirm that personal identifying information  
2 such as patient names and medical record identification are deleted from the data. Thereafter,  
3 a linkable anonymized number is set and stored by a personal information manager for at  
4 least 5 years after study completion.

## 5 6 **Data monitoring**

7 Central monitoring will be conducted with the aim of ensuring that the trials are conducted  
8 safely and in accordance with the implementation plan, and that the data collection is  
9 performed correctly. It is conducted once a year, with 10% of registration completed in each  
10 institution. The number of consents acquired, number of patients registered, number of  
11 patients who withdraw or are lost to follow-up and their reasons, safety, compliance with  
12 eligibility criteria and exclusion criteria, accuracy of the allocation procedure, and  
13 compliance with various regulations and research plan are all evaluated by the test secretariat.

## 14 15 **Sample size calculation**

16 At our institution, the estimated rate of SSI after gastrointestinal surgery with wound class II  
17 is 12% (this rate was only included in a non-published Japanese report) after povidone-iodine

1  
2  
3  
4 1 use and 6% after olanexidine use. Assuming a group difference of 6% during the study  
5  
6  
7  
8 2 period, 281 patients per group would provide a power of over 80%, which is sufficient for  
9  
10  
11 3 detecting a difference in the proportion of SSI between olanexidine and povidone-iodine  
12  
13  
14 4 using a one-sided chi-square test at a 5% level of significance. A dropout rate of about 5% is  
15  
16  
17  
18 5 allowed; thus, with 300 patients required per group, a total sample size of 600 patients is  
19  
20  
21 6 required for the trial.  
22  
23  
24  
25  
26  
27  
28  
29  
30  
31  
32  
33  
34  
35  
36  
37  
38  
39  
40  
41  
42  
43  
44  
45  
46  
47  
48  
49  
50  
51  
52  
53  
54  
55  
56  
57  
58  
59  
60

## 8 **Patient and Public Involvement**

9 The patients and the public were not involved in the design of this study.  
10

## 11 **Statistical analysis**

12 We will perform the primary analyses using the full analysis set, from which patients who  
13 do not undergo surgery or who withdraw consent before assessment of the primary endpoint  
14 are excluded. In addition, we will repeat the analyses in the per-protocol set, further  
15 excluding patients with major protocol deviations. The safety analysis set will include all  
16 patients who were randomly assigned to a study group and received treatment during the  
17 study period. For the baseline variables, summary statistics will be performed using  
18 frequencies and proportions for categorical data and means and standard deviations for  
19 continuous variables. Patient characteristics will be compared using Pearson's chi-square test  
20 or Fisher's exact test for categorical outcomes, and Student's t-test for continuous variables,

1 as appropriate. For the primary analysis, which is aimed at comparing the treatment effects,  
2 the adjusted risk ratio and its 95% confidence interval will be estimated using the  
3 Mantel-Haenszel method. To test for a significant association of the primary outcome, the  
4 Mantel-Haenszel test will be applied after adjusting for allocation factors. All comparisons  
5 are planned, and all *p*-values will be two sided. *P*-values <0.05 will be considered statistically  
6 significant. All statistical analyses will be performed using SAS software version 9.4 (SAS  
7 Institute, Cary, NC, USA). The SAP will be developed by the principal investigator and the  
8 biostatistician before completion of patient recruitment and data fixation.

1  
2  
3  
4  
5  
6  
7  
8  
9  
10  
11  
12  
13  
14  
15  
16  
17  
18  
19  
20  
21  
22  
23  
24  
25  
26  
27  
28  
29  
30  
31  
32  
33  
34  
35  
36  
37  
38  
39  
40  
41  
42  
43  
44  
45  
46  
47  
48  
49  
50  
51  
52  
53  
54  
55  
56  
57  
58  
59  
60

1

2 **ETHICS AND DISSEMINATION**

3 Participant recruitment began in June 2018. The final results will be published in  
4 international peer-reviewed medical journals.

For peer review only

1

## 2 DISCUSSION

3 Although some guidelines have indicated the efficacy of chlorhexidine-alcohol and  
4 povidone-iodine for reducing the SSI rate, the optimal recommendation has still not been  
5 established, and the prevalence of SSI remains high in gastrointestinal surgery. Therefore, a  
6 comparative trial between conventional antiseptics, including chlorhexidine-alcohol and  
7 povidone-iodine, and newly developed antiseptics that considers their effectiveness, toxicity,  
8 and costs is needed.<sup>8</sup>

9 We have been conducting a randomized controlled clinical trial to compare olanexidine and  
10 povidone-iodine, which is the most popular antiseptic in Japan in terms of prevalence of SSI  
11 and its low toxicity. The strength of this trial is that we adopted blinding for diagnosing SSI  
12 at the multiple centers. To maintain the quality of practices, only 4 centers, all of which are  
13 high-volume centers performing greater than 500 gastrointestinal surgeries per year, are  
14 participating in this trial. Furthermore, since the staff in each center belongs to the SSI  
15 control committee, which provides unified and evidence-based counter measures against SSI  
16 at Keio University Hospital, the management of SSI at each center can be performed in  
17 almost the same manner.

1  
2  
3  
4 1 In this study, we have used povidone-iodine instead of chlorhexidine-alcohol as a control.  
5  
6  
7 2 Since chlorhexidine-alcohol is associated with inflammation, povidone-iodine is  
8  
9  
10 3 recommended and typically used for gastrointestinal surgery in Japan. In addition,  
11  
12  
13 4 chlorhexidine-alcohol at concentrations greater than 1% is not commercially available in  
14  
15  
16 5 Japan, although a concentration greater than 2% is recognized as having a bactericidal effect  
17  
18  
19 6 in international guidelines.<sup>21-23</sup> Moreover, considering the influence of ethnic differences,  
20  
21  
22 7 including intrinsic and extrinsic ethnic factors, this comparison is a meaningful examination  
23  
24  
25 8 of SSI treatment, at least in Japan. Therefore, we think that the selection of the control group  
26  
27  
28 9 is reasonable.  
29  
30  
31  
32  
33

34 10 Although antisepsis would influence only superficial and deep SSIs, we included  
35  
36  
37 11 organ-space SSI in the endpoint. As described earlier, this is the first study to use  
38  
39  
40 12 olanexidine; therefore, it is more important to establish evidence for all types of SSI than to  
41  
42  
43 13 limit the study to superficial and deep wound infections. Some studies have investigated skin  
44  
45  
46 14 antisepsis in gastrointestinal surgery and included organ SSI as an outcome.<sup>11,12</sup>  
47  
48  
49

50  
51 15 This study has several limitations. First, this trial is recruiting patients undergoing various  
52  
53  
54 16 types of gastrointestinal surgery, such as esophagectomy, gastrectomy, and cholecystectomy,  
55  
56  
57 17 which have different rates of SSI. However, there is no major bias in allocation because it is  
58  
59  
60

1  
2  
3  
4 1 randomized. Furthermore, since this is the first report using olanexidine, it is more important  
5  
6  
7  
8 2 to include various operations than to limit the study to a particular procedure. Second, this  
9  
10  
11 3 study is limited to the Japanese population because olanexidine is only commercially  
12  
13  
14 4 available in Japan, which could introduce an element of selection bias,  
15  
16

17  
18 5 In conclusion, the present study is assessing the efficacy of olanexidine compared to  
19  
20  
21 6 povidone-iodine for preventing SSI in gastrointestinal surgery. We expect olanexidine to be  
22  
23  
24 7 more effective for preventing SSI than povidone-iodine without increasing toxicity. In the  
25  
26  
27  
28 8 future, if superiority of olanexidine compared to povidone-iodine is proven in this trial, we  
29  
30  
31 9 should also consider conducting another trial that compares olanexidine to an alcohol-based  
32  
33  
34 10 antiseptic agent. Even if this prediction is not the final result, this trial can provide new  
35  
36  
37  
38 11 knowledge in terms of antiseptics for preventing SSI. The result will also contribute to the  
39  
40  
41 12 development of new antiseptics treatments for gastrointestinal surgery.  
42  
43  
44  
45  
46  
47  
48  
49  
50  
51  
52  
53  
54  
55  
56  
57  
58  
59  
60



1  
2  
3  
4  
5  
6  
7  
8  
9  
10  
11  
12  
13  
14  
15  
16  
17  
18  
19  
20  
21  
22  
23  
24  
25  
26  
27  
28  
29  
30  
31  
32  
33  
34  
35  
36  
37  
38  
39  
40  
41  
42  
43  
44  
45  
46  
47  
48  
49  
50  
51  
52  
53  
54  
55  
56  
57  
58  
59  
60

1

2 **TRIAL STATUS**

3 As of 25 October 2018, this trial is actively recruiting patients at 3 centers with additional  
4 centers planned. Two hundred of the planned 600 participants have been enrolled.

For peer review only

1

## 2 **AUTHORS' CONTRIBUTIONS**

3 MK and HO contributed equally to this study. All authors made significant contribution to  
4 the conception and design of the study protocol. MT designed the study and wrote the  
5 protocol and manuscript. SM, TI, KF, RN, NW, MK, HY, YA, GO, SH, MT, TI, TY, KH,  
6 YI, YS, HH, YM, MS, and TK assisted with the development of the study design and  
7 protocol. The protocol was reviewed by HO, HK, MS, KO, and YK. YS wrote the statistical  
8 analysis plan. All authors gave final approval of the manuscript and agree to be accountable  
9 for all aspects of the work.

10

## 11 **FUNDING**

12 This work was supported by donations from the Department of Surgery, Keio University  
13 School of Medicine and Ohyama Health Foundation Inc.

14

## 15 **DISCLAIMER**

16 Otsuka Pharmaceutical Factory Inc. was not involved in the planning of the protocol or in the  
17 conduct of the trial.

1  
2  
3  
4 15  
6  
7  
8 2 **COMPETING INTERESTS**9  
10  
11 3 Yuko Kitagawa received grant support from Otsuka Pharmaceutical Factory Inc.  
12  
13  
14 415  
16  
17  
18 5 **ETHICS APPROVAL**19  
20  
21 6 The protocol was first approved by the Institutional Review Board of Keio University School  
22  
23  
24 7 of Medicine, and then approved by the institutional review board of each participating site.  
25  
26  
27 828  
29  
30  
31 9 **ACKNOWLEDGMENTS**32  
33  
34 10 The authors thank Asako Inoue and Kumiko Motooka, staff members of the Department of  
35  
36  
37 11 Surgery in Keio University School of Medicine, for their help in the preparation of this  
38  
39  
40  
41 12 manuscript.  
42  
43  
44  
45  
46  
47  
48  
49  
50  
51  
52  
53  
54  
55  
56  
57  
58  
59  
60

1

2 **REFERENCES**

- 3 1. Berríos-Torres SI, Umscheid CA, Bratzler DW, et al: Centers for Disease Control  
4 and Prevention Guideline for the Prevention of Surgical Site Infection, 2017. *JAMA Surgery*  
5 152:784-791, 2017
- 6 2. Steiner HL, Strand EA: Surgical-site infection in gynecologic surgery:  
7 pathophysiology and prevention. *Am J Obstet Gynecol* 217:121-128, 2017
- 8 3. López Pereira P, Díaz-Agero Pérez C, López Fresneña N, et al: 'Epidemiology of  
9 surgical site infection in a neurosurgery department'. *Br J Neurosurg* 31:10-15, 2016
- 10 4. Figuerola-Tejerina A, Rodríguez-Caravaca G, Bustamante-Munguira J, et al:  
11 Epidemiological Surveillance of Surgical Site Infection and its Risk Factors in Cardiac  
12 Surgery: A Prospective Cohort Study. *Rev Esp Cardiol (Engl Ed)* 69:842-848, 2016
- 13 5. Maehara Y, Shirabe K, Kohnoe S, et al: Impact of intra-abdominal absorbable  
14 sutures on surgical site infection in gastrointestinal and hepato-biliary-pancreatic surgery:  
15 results of a multicenter, randomized, prospective, phase II clinical trial. *Surg Today*  
16 47:1060-1071, 2017
- 17 6. Kirkland KB, Briggs, JP, Trivette, S, et al: The Impact of Surgical-Site Infections

- 1  
2  
3  
4 1 in the 1990s: Attributable Mortality, Excess Length of Hospitalization, And Extra Costs.  
5  
6  
7 2 *Infect Control Hosp Epidemiol* 20: 725-730. 1999  
8  
9  
10  
11 3 7. de Lissovoy G, Fraeman K, Hutchins V, et al: Surgical site infection: incidence  
12  
13  
14 4 and impact on hospital utilization and treatment costs. *Am J Infect Control* 37:387-397, 2009  
15  
16  
17 5 8. Allegranzi B, Bischoff P, de Jonge S, et al: New WHO recommendations on  
18  
19  
20 6 preoperative measures for surgical site infection prevention: an evidence-based global  
21  
22  
23 7 perspective. *Lancet Infect Dis* 16:e276-e287, 2016  
24  
25  
26  
27 8 9. Srinivas A, Kaman L, Raj P, et al: Comparison of the efficacy of chlorhexidine  
28  
29  
30 9 gluconate versus povidone iodine as preoperative skin preparation for the prevention of  
31  
32  
33 10 surgical site infections in clean-contaminated upper abdominal surgeries. *Surg Today*  
34  
35  
36 11 45:1378-1384, 2015  
37  
38  
39  
40  
41 12 10. Springel EH, Wang XY, Sarfoh VM, et al: A randomized open-label controlled  
42  
43  
44 13 trial of chlorhexidine-alcohol vs povidone-iodine for cesarean antisepsis: the CAPICA trial.  
45  
46  
47 14 *Am J Obstet Gynecol* 217:463 e1-463 e8, 2017  
48  
49  
50  
51 15 11. Darouiche RO, Wall MJ Jr., Itani KM, et al: Chlorhexidine-Alcohol versus  
52  
53  
54 16 Povidone-Iodine for Surgical-Site Antisepsis. *N Engl J Med* 362:18-26, 2010  
55  
56  
57 17 12. Park HM, Han SS, Lee EC, et al: Randomized clinical trial of preoperative skin  
58  
59  
60

- 1  
2  
3  
4 1 antiseptics with chlorhexidine gluconate or povidone-iodine. *Br J Surg* 104:e145-e150, 2017  
5  
6  
7  
8 2 13. National Institute for Health and Clinical Excellence (NICE). Surgical Site  
9  
10  
11 3 Infection: Prevention and Treatment of Surgical Site Infection (NICE Clinical Guideline 74).  
12  
13  
14 4 2008  
15  
16  
17 5 14. Burlingame B DB, Link T, et al: Guideline for Preoperative Patient Skin  
18  
19  
20  
21 6 Antisepsis. In: Connor R, ed. AORN Guidelines for Perioperative Practice. Denver, CO:  
22  
23  
24 7 Association of periOperative Registered Nurses; 2016  
25  
26  
27 8 15. Zamora JL Price MF, Chuang P, et al: Inhibition of povidone-iodine's  
28  
29  
30  
31 9 bactericidal activity by common organic substances: an experimental study. *Surgery*  
32  
33  
34 10 98:25-29, 1985  
35  
36  
37  
38 11 16. Lee I, Agarwal RK, Lee BY, Fishman NO, Umscheid CA. Systematic review and  
39  
40  
41 12 cost analysis comparing use of chlorhexidine with use of iodine for preoperative skin  
42  
43  
44 13 antiseptics to prevent surgical site infection. *Infect Control Hosp Epidemiol* 31:1219-1229,  
45  
46  
47 14 2010  
48  
49  
50  
51 15 17. Lim KS, Kam PC. Chlorhexidine — pharmacology and clinical applications.  
52  
53  
54 16 *Anaesth Intensive Care* 36:502-512, 2008  
55  
56  
57 17 18. Inoue Y, Hagi A, Nii T, et al: Novel antiseptic compound OPB-2045G shows  
58  
59  
60

1  
2  
3  
4 1 potent bactericidal activity against methicillin-resistant *Staphylococcus aureus* and  
5  
6  
7  
8 2 vancomycin-resistant *Enterococcus* both in vitro and in vivo: a pilot study in animals. *J Med*  
9  
10  
11 3 *Microbiol* 64:32-36, 2015  
12  
13

14 4 19. Hagi A, Iwata K, Nii T, et al: Bactericidal Effects and Mechanism of Action of  
15  
16  
17 5 Olanexidine Gluconate, a New Antiseptic. *Antimicrob Agents and Chemother* 59:4551-4559,  
18  
19  
20  
21 6 2015  
22  
23

24 7 20. Howard DP, Datta G, Cunnick G, et al: Surgical site infection rate is lower in  
25  
26  
27 8 laparoscopic than open colorectal surgery. *Colorectal Dis* 12:423-7, 2010  
28  
29

30  
31 9 21. Preventing surgical site infections. Key recommendations for practice. Dublin:  
32  
33  
34 10 Joint Royal College of Surgeons in Ireland/Royal Colleges of Physicians of Ireland Working  
35  
36  
37 11 Group on Prevention of Surgical Site Infection; 2012  
38  
39

40  
41 12 22. Targeted literature review: What are the key infection prevention and control  
42  
43  
44 13 recommendations to inform a surgical site infection (SSI) prevention quality improvement  
45  
46  
47 14 tool? Version 3.0. February 2015. Edinburgh: Health Protection Scotland; 2015  
48  
49

50  
51 15 23. High impact intervention: care bundle to prevent surgical site infection. London:  
52  
53  
54 16 Department of Health; 2011  
55  
56

57  
58 17  
59  
60

1  
2  
3  
4 15  
6  
7  
8 29  
10  
11 3 **Table 1** Definition of the wound classes  
12

---

| Wound Class                   | Definition                                                                                                                                                    |
|-------------------------------|---------------------------------------------------------------------------------------------------------------------------------------------------------------|
| Class I (Clean)               | An uninfected operative wound in which no inflammation is encountered and the respiratory, alimentary, genital, or uninfected urinary tracts are not entered. |
| Class II (Clean-contaminated) | Operative wounds in which the respiratory, alimentary, genital, or urinary tracts are entered under controlled conditions and without unusual contamination.  |
| Class III (Contaminated)      | Includes open, fresh, and accidental wounds.                                                                                                                  |
| Class IV (Dirty-contaminated) | Includes old traumatic wounds with retained devitalized tissue and those that involve existing clinical infection or perforated viscera.                      |

---



1

2 **Table 2** Flow chart of the trial

| Time point                           | After admission          | Before surgery           | Surgery                  | After surgery              |
|--------------------------------------|--------------------------|--------------------------|--------------------------|----------------------------|
| Informed consent                     | <input type="checkbox"/> |                          |                          |                            |
| Patients' background characteristics | <input type="checkbox"/> |                          |                          |                            |
| Physical examination                 | <input type="checkbox"/> |                          |                          |                            |
| Randomization                        |                          | <input type="checkbox"/> |                          |                            |
| Intervention                         |                          |                          | <input type="checkbox"/> |                            |
| Observation of the surgical site     |                          |                          |                          | <input type="checkbox"/> a |

3 a: From postoperative day 1 to postoperative day 30 (outpatient observation is performed at

4 least once if the discharge is within 30 days postoperatively)

**Supplemental Table 1** Definitions of SSI

| Type of SSI                | Definition                                                                                                                                                                                                                                                                                                                                                                                                                                                                                                                                                                                                                                                                                                                                                                                                                                                                               |
|----------------------------|------------------------------------------------------------------------------------------------------------------------------------------------------------------------------------------------------------------------------------------------------------------------------------------------------------------------------------------------------------------------------------------------------------------------------------------------------------------------------------------------------------------------------------------------------------------------------------------------------------------------------------------------------------------------------------------------------------------------------------------------------------------------------------------------------------------------------------------------------------------------------------------|
| Superficial incisional SSI | <p>Superficial incisional SSI must meet the following three criteria (A, B, and C).</p> <p>A) Infection occurred within 30 days postoperatively.</p> <p>B) The infection affects only the incision in the skin and the subcutaneous tissue.</p> <p>C) At least one of the following is applicable:</p> <ol style="list-style-type: none"><li>purulent drainage is observed from the superficial incision,</li><li>organisms are identified from the superficial incision or subcutaneous tissue by a culture or non-culture based microbiologic testing method, and/or</li><li>the superficial incision is deliberately opened by a nonblinded investigators, and culture or non-culture based testing is not performed.</li></ol> <p>In addition, at least one of the following symptoms for infection must be applicable: pain, tenderness, localized swelling, erythema, or heat.</p> |
| Deep incisional SSI        | <p>Deep incisional SSI must meet the following three criteria (A, B, and C).</p> <p>A) Infection occurred within 30 days postoperatively.</p> <p>B) The infection reaches the deep soft tissues of the incision (fascia or muscle layer).</p> <p>C) At least one of the following is applicable:</p> <ol style="list-style-type: none"><li>purulent drainage is observed from the deep incision,</li><li>the deep incision spontaneously dehisces, or is deliberately opened or aspirated by a nonblinded investigators, and/or</li></ol>                                                                                                                                                                                                                                                                                                                                                |

1  
2  
3  
4  
5 c. an abscess or other evidence of infection is present and involves the deep incision.

6 In addition, the organism is identified by a culture or non-culture based microbiologic  
7 testing method that is performed for purposes of clinical diagnosis or treatment, and  
8 symptoms for infection must be applicable: fever, localized pain, or tenderness. Negative  
9 finding of a culture does not meet this criterion.  
10  
11

---

12  
13 Organ/space SSI

14 Organ/space SSI involves any part of the body other than the skin incision, fascia, or  
15 muscle layer that has been opened or manipulated during surgery. The specific site is  
16 classified as organ/space for the purpose of further identification of the infection site.  
17 Organ/space SSI must meet the following three criteria (A, B, and C).

18 A) Infection occurred within 30 days postoperatively.

19 B) The infection involves any part of the body that is opened or manipulated during the  
20 operative procedure (except for the facial/muscle layers).

21 C) At least one of the following is applicable:

22 a. purulent drainage is observed from a drain that is placed into the organ/space,

23 b. organisms are identified from fluid or tissue in the organ/space by a culture or non-  
24 culture based microbiologic testing method, and/or

25 c. an abscess or other evidence of infection is present and involves the organ/space.  
26  
27  
28  
29  
30

---

31  
32 \*Erythema; the skin redness of the skin that spreads away from the incision site, localized swelling; a bulge limited to the incision site,

33  
34  
35 tenderness; pressured pain beyond normal for the operation.  
36  
37  
38  
39  
40  
41  
42  
43  
44  
45  
46

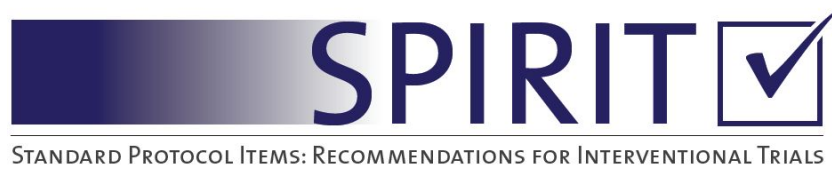

SPIRIT 2013 Checklist: Recommended items to address in a clinical trial protocol and related documents\*

| Section/item                      | ItemN<br>o<br>(Page<br>No) | Description                                                                                                                                                                                                                                                                              |
|-----------------------------------|----------------------------|------------------------------------------------------------------------------------------------------------------------------------------------------------------------------------------------------------------------------------------------------------------------------------------|
| <b>Administrative information</b> |                            |                                                                                                                                                                                                                                                                                          |
| Title                             | 1(p1)                      | Descriptive title identifying the study design, population, interventions, and, if applicable, trial acronym                                                                                                                                                                             |
| Trial registration                | 2a<br>(p4)                 | Trial identifier and registry name. If not yet registered, name of intended registry                                                                                                                                                                                                     |
|                                   | 2b<br>(n/a)                | All items from the World Health Organization Trial Registration Data Set                                                                                                                                                                                                                 |
|                                   | 3 (p12)                    | Date and version identifier                                                                                                                                                                                                                                                              |
| Funding                           | 4 (p24)                    | Sources and types of financial, material, and other support                                                                                                                                                                                                                              |
| Roles and responsibilities        | 5a<br>(p24)                | Names, affiliations, and roles of protocol contributors                                                                                                                                                                                                                                  |
|                                   | 5b<br>(p2)                 | Name and contact information for the trial sponsor                                                                                                                                                                                                                                       |
|                                   | 5c<br>(n/a)                | Role of study sponsor and funders, if any, in study design; collection, management, analysis, and interpretation of data; writing of the report; and the decision to submit the report for publication, including whether they will have ultimate authority over any of these activities |
|                                   | 5d<br>(n/a)                | Composition, roles, and responsibilities of the coordinating centre, steering committee, endpoint adjudication committee, data management team, and other individuals or groups overseeing the trial, if applicable (see Item 21a for data monitoring committee)                         |
| <b>Introduction</b>               |                            |                                                                                                                                                                                                                                                                                          |
| Background and rationale          | 6a<br>(p6-8)               | Description of research question and justification for undertaking the trial, including summary of relevant studies (published and unpublished) examining benefits and harms for each intervention                                                                                       |
|                                   | 6b<br>(p6-8)               | Explanation for choice of comparators                                                                                                                                                                                                                                                    |

|    |                                                                     |        |                                                                           |
|----|---------------------------------------------------------------------|--------|---------------------------------------------------------------------------|
| 1  |                                                                     |        |                                                                           |
| 2  | Objectives                                                          | 7      | Specific objectives or hypotheses                                         |
| 3  |                                                                     | (p6-8) |                                                                           |
| 4  |                                                                     |        |                                                                           |
| 5  | Trial design                                                        | 8      | Description of trial design including type of trial (eg, parallel group,  |
| 6  |                                                                     | (p6-8) | crossover, factorial, single group), allocation ratio, and framework      |
| 7  |                                                                     |        | (eg, superiority, equivalence, noninferiority, exploratory)               |
| 8  |                                                                     |        |                                                                           |
| 9  |                                                                     |        |                                                                           |
| 10 |                                                                     |        |                                                                           |
| 11 | <b>Methods: Participants, interventions, and outcomes</b>           |        |                                                                           |
| 12 |                                                                     |        |                                                                           |
| 13 | Study setting                                                       | 9      | Description of study settings (eg, community clinic, academic             |
| 14 |                                                                     | (p12)  | hospital) and list of countries where data will be collected.             |
| 15 |                                                                     |        | Reference to where list of study sites can be obtained                    |
| 16 |                                                                     |        |                                                                           |
| 17 | Eligibility criteria                                                | 10     | Inclusion and exclusion criteria for participants. If applicable,         |
| 18 |                                                                     | (p9)   | eligibility criteria for study centres and individuals who will perform   |
| 19 |                                                                     |        | the interventions (eg, surgeons, psychotherapists)                        |
| 20 |                                                                     |        |                                                                           |
| 21 |                                                                     |        |                                                                           |
| 22 | Interventions                                                       | 11a    | Interventions for each group with sufficient detail to allow replication, |
| 23 |                                                                     | (p10)  | including how and when they will be administered                          |
| 24 |                                                                     |        |                                                                           |
| 25 |                                                                     | 11b    | Criteria for discontinuing or modifying allocated interventions for a     |
| 26 |                                                                     | (p10)  | given trial participant (eg, drug dose change in response to harms,       |
| 27 |                                                                     |        | participant request, or improving/worsening disease)                      |
| 28 |                                                                     |        |                                                                           |
| 29 |                                                                     | 11c    | Strategies to improve adherence to intervention protocols, and any        |
| 30 |                                                                     | (n/a)  | procedures for monitoring adherence (eg, drug tablet return,              |
| 31 |                                                                     |        | laboratory tests)                                                         |
| 32 |                                                                     |        |                                                                           |
| 33 |                                                                     |        |                                                                           |
| 34 |                                                                     | 11d    | Relevant concomitant care and interventions that are permitted or         |
| 35 |                                                                     | (p10)  | prohibited during the trial                                               |
| 36 |                                                                     |        |                                                                           |
| 37 | Outcomes                                                            | 12     | Primary, secondary, and other outcomes, including the specific            |
| 38 |                                                                     | (p14)  | measurement variable (eg, systolic blood pressure), analysis metric       |
| 39 |                                                                     |        | (eg, change from baseline, final value, time to event), method of         |
| 40 |                                                                     |        | aggregation (eg, median, proportion), and time point for each             |
| 41 |                                                                     |        | outcome. Explanation of the clinical relevance of chosen efficacy         |
| 42 |                                                                     |        | and harm outcomes is strongly recommended                                 |
| 43 |                                                                     |        |                                                                           |
| 44 |                                                                     |        |                                                                           |
| 45 | Participant                                                         | 13     | Time schedule of enrolment, interventions (including any run-ins and      |
| 46 | timeline                                                            | (p14)  | washouts), assessments, and visits for participants. A schematic          |
| 47 |                                                                     |        | diagram is highly recommended (see Figure)                                |
| 48 |                                                                     |        |                                                                           |
| 49 |                                                                     |        |                                                                           |
| 50 | Sample size                                                         | 14     | Estimated number of participants needed to achieve study                  |
| 51 |                                                                     | (p17)  | objectives and how it was determined, including clinical and              |
| 52 |                                                                     |        | statistical assumptions supporting any sample size calculations           |
| 53 |                                                                     |        |                                                                           |
| 54 | Recruitment                                                         | 15     | Strategies for achieving adequate participant enrolment to reach          |
| 55 |                                                                     | (p12)  | target sample size                                                        |
| 56 |                                                                     |        |                                                                           |
| 57 |                                                                     |        |                                                                           |
| 58 | <b>Methods: Assignment of interventions (for controlled trials)</b> |        |                                                                           |
| 59 |                                                                     |        |                                                                           |
| 60 | Allocation:                                                         |        |                                                                           |

|    |                |       |                                                                        |
|----|----------------|-------|------------------------------------------------------------------------|
| 1  |                |       |                                                                        |
| 2  | Sequence       | 16a   | Method of generating the allocation sequence (eg, computer-            |
| 3  | generation     | (p12) | generated random numbers), and list of any factors for stratification. |
| 4  |                |       | To reduce predictability of a random sequence, details of any          |
| 5  |                |       | planned restriction (eg, blocking) should be provided in a separate    |
| 6  |                |       | document that is unavailable to those who enrol participants or        |
| 7  |                |       | assign interventions                                                   |
| 8  |                |       |                                                                        |
| 9  |                |       |                                                                        |
| 10 | Allocation     | 16b   | Mechanism of implementing the allocation sequence (eg, central         |
| 11 | concealment    | (p14) | telephone; sequentially numbered, opaque, sealed envelopes),           |
| 12 | mechanism      |       | describing any steps to conceal the sequence until interventions are   |
| 13 |                |       | assigned                                                               |
| 14 |                |       |                                                                        |
| 15 | Implementation | 16c   | Who will generate the allocation sequence, who will enrol              |
| 16 |                | (p12) | participants, and who will assign participants to interventions        |
| 17 |                |       |                                                                        |
| 18 | Blinding       | 17a   | Who will be blinded after assignment to interventions (eg, trial       |
| 19 | (masking)      | (p13) | participants, care providers, outcome assessors, data analysts), and   |
| 20 |                |       | how                                                                    |
| 21 |                |       |                                                                        |
| 22 |                |       |                                                                        |
| 23 |                | 17b   | If blinded, circumstances under which unblinding is permissible, and   |
| 24 |                | (n/a) | procedure for revealing a participant's allocated intervention during  |
| 25 |                |       | the trial                                                              |
| 26 |                |       |                                                                        |
| 27 |                |       |                                                                        |

### Methods: Data collection, management, and analysis

|    |                 |       |                                                                          |
|----|-----------------|-------|--------------------------------------------------------------------------|
| 28 |                 |       |                                                                          |
| 29 |                 |       |                                                                          |
| 30 | Data collection | 18a   | Plans for assessment and collection of outcome, baseline, and other      |
| 31 | methods         | (p16) | trial data, including any related processes to promote data quality      |
| 32 |                 |       | (eg, duplicate measurements, training of assessors) and a                |
| 33 |                 |       | description of study instruments (eg, questionnaires, laboratory         |
| 34 |                 |       | tests) along with their reliability and validity, if known. Reference to |
| 35 |                 |       | where data collection forms can be found, if not in the protocol         |
| 36 |                 |       |                                                                          |
| 37 |                 |       |                                                                          |
| 38 |                 | 18b   | Plans to promote participant retention and complete follow-up,           |
| 39 |                 | (p16) | including list of any outcome data to be collected for participants      |
| 40 |                 |       | who discontinue or deviate from intervention protocols                   |
| 41 |                 |       |                                                                          |
| 42 | Data            | 19    | Plans for data entry, coding, security, and storage, including any       |
| 43 | management      | (p16) | related processes to promote data quality (eg, double data entry;        |
| 44 |                 |       | range checks for data values). Reference to where details of data        |
| 45 |                 |       | management procedures can be found, if not in the protocol               |
| 46 |                 |       |                                                                          |
| 47 |                 |       |                                                                          |
| 48 | Statistical     | 20a   | Statistical methods for analysing primary and secondary outcomes.        |
| 49 | methods         | (p17) | Reference to where other details of the statistical analysis plan can    |
| 50 |                 |       | be found, if not in the protocol                                         |
| 51 |                 |       |                                                                          |
| 52 |                 |       |                                                                          |
| 53 |                 | 20b   | Methods for any additional analyses (eg, subgroup and adjusted           |
| 54 |                 | (p17) | analyses)                                                                |
| 55 |                 |       |                                                                          |
| 56 |                 | 20c   | Definition of analysis population relating to protocol non-adherence     |
| 57 |                 | (p17) | (eg, as randomised analysis), and any statistical methods to handle      |
| 58 |                 |       | missing data (eg, multiple imputation)                                   |
| 59 |                 |       |                                                                          |
| 60 |                 |       |                                                                          |

**Methods: Monitoring**

|                 |              |                                                                                                                                                                                                                                                                                                                                       |
|-----------------|--------------|---------------------------------------------------------------------------------------------------------------------------------------------------------------------------------------------------------------------------------------------------------------------------------------------------------------------------------------|
| Data monitoring | 21a<br>(p16) | Composition of data monitoring committee (DMC); summary of its role and reporting structure; statement of whether it is independent from the sponsor and competing interests; and reference to where further details about its charter can be found, if not in the protocol. Alternatively, an explanation of why a DMC is not needed |
|                 | 21b<br>(p16) | Description of any interim analyses and stopping guidelines, including who will have access to these interim results and make the final decision to terminate the trial                                                                                                                                                               |
| Harms           | 22<br>(n/a)  | Plans for collecting, assessing, reporting, and managing solicited and spontaneously reported adverse events and other unintended effects of trial interventions or trial conduct                                                                                                                                                     |
| Auditing        | 23<br>(n/a)  | Frequency and procedures for auditing trial conduct, if any, and whether the process will be independent from investigators and the sponsor                                                                                                                                                                                           |

**Ethics and dissemination**

|                               |              |                                                                                                                                                                                                                                  |
|-------------------------------|--------------|----------------------------------------------------------------------------------------------------------------------------------------------------------------------------------------------------------------------------------|
| Research ethics approval      | 24<br>(p19)  | Plans for seeking research ethics committee/institutional review board (REC/IRB) approval                                                                                                                                        |
| Protocol amendments           | 25<br>(n/a)  | Plans for communicating important protocol modifications (eg, changes to eligibility criteria, outcomes, analyses) to relevant parties (eg, investigators, REC/IRBs, trial participants, trial registries, journals, regulators) |
| Consent or assent             | 26a<br>(p12) | Who will obtain informed consent or assent from potential trial participants or authorised surrogates, and how (see Item 32)                                                                                                     |
|                               | 26b<br>(n/a) | Additional consent provisions for collection and use of participant data and biological specimens in ancillary studies, if applicable                                                                                            |
| Confidentiality               | 27<br>(p15)  | How personal information about potential and enrolled participants will be collected, shared, and maintained in order to protect confidentiality before, during, and after the trial                                             |
| Declaration of interests      | 28<br>(p24)  | Financial and other competing interests for principal investigators for the overall trial and each study site                                                                                                                    |
| Access to data                | 29<br>(n/a)  | Statement of who will have access to the final trial dataset, and disclosure of contractual agreements that limit such access for investigators                                                                                  |
| Ancillary and post-trial care | 30<br>(n/a)  | Provisions, if any, for ancillary and post-trial care, and for compensation to those who suffer harm from trial participation                                                                                                    |

|    |               |       |                                                                        |
|----|---------------|-------|------------------------------------------------------------------------|
| 1  |               |       |                                                                        |
| 2  | Dissemination | 31a   | Plans for investigators and sponsor to communicate trial results to    |
| 3  | policy        | (n/a) | participants, healthcare professionals, the public, and other relevant |
| 4  |               |       | groups (eg, via publication, reporting in results databases, or other  |
| 5  |               |       | data sharing arrangements), including any publication restrictions     |
| 6  |               |       |                                                                        |
| 7  |               | 31b   | Authorship eligibility guidelines and any intended use of professional |
| 8  |               | (p24) | writers                                                                |
| 9  |               |       |                                                                        |
| 10 |               | 31c   | Plans, if any, for granting public access to the full protocol,        |
| 11 |               | (n/a) | participant-level dataset, and statistical code                        |
| 12 |               |       |                                                                        |
| 13 |               |       |                                                                        |

## Appendices

|    |                  |       |                                                                        |
|----|------------------|-------|------------------------------------------------------------------------|
| 14 |                  |       |                                                                        |
| 15 |                  |       |                                                                        |
| 16 | Informed consent | 32    | Model consent form and other related documentation given to            |
| 17 | materials        | (n/a) | participants and authorised surrogates                                 |
| 18 |                  |       |                                                                        |
| 19 | Biological       | 33    | Plans for collection, laboratory evaluation, and storage of biological |
| 20 | specimens        | (n/a) | specimens for genetic or molecular analysis in the current trial and   |
| 21 |                  |       | for future use in ancillary studies, if applicable                     |
| 22 |                  |       |                                                                        |

---

\*It is strongly recommended that this checklist be read in conjunction with the SPIRIT 2013 Explanation & Elaboration for important clarification on the items. Amendments to the protocol should be tracked and dated. The SPIRIT checklist is copyrighted by the SPIRIT Group under the Creative Commons "[Attribution-NonCommercial-NoDerivs 3.0 Unported](https://creativecommons.org/licenses/by-nc-nd/3.0/)" license.
